# Supplementary material
Source: HighWire-hosted journal article supplement (https://bmjmedicine.bmj.com/highwire/filestream/474/field_highwire_adjunct_files/0/bmjmed-2021-000017supp001_data_supplement.pdf)
Supplement: bmjmed-2021-000017supp001_data_supplement.pdf [file bmjmed-2021-000017supp001_data_supplement.pdf]

## Supplementary file 1

### Contents

|                                                                        |    |
|------------------------------------------------------------------------|----|
| Table S1 – Treatment of depression guidelines .....                    | 2  |
| Search strategies.....                                                 | 5  |
| Embase 1975 to 2021 .....                                              | 5  |
| Ovid Medline (R) All 1975 to 2021 .....                                | 6  |
| Embase, Ovid Medline (R) All, and PsychInfo 1975 to 2021.....          | 7  |
| Table S2 – Characteristics of reviews meeting inclusion criteria ..... | 9  |
| Table S3 – Risk of bias.....                                           | 15 |
| Table S4 – Primary studies quality rating .....                        | 16 |
| Primary studies references .....                                       | 21 |

**Table S1 – Treatment of depression guidelines**

| <b>Guidelines highlighting dose-response effects</b>                                   |                                              |                                                                                                                                                                                                                                                                                                                                                                                                                                                                                                                                                                      |
|----------------------------------------------------------------------------------------|----------------------------------------------|----------------------------------------------------------------------------------------------------------------------------------------------------------------------------------------------------------------------------------------------------------------------------------------------------------------------------------------------------------------------------------------------------------------------------------------------------------------------------------------------------------------------------------------------------------------------|
| <b>Guideline</b>                                                                       | <b>Section/Page</b>                          | <b>Dose specific text</b>                                                                                                                                                                                                                                                                                                                                                                                                                                                                                                                                            |
| British Association of Psychopharmacology (2015) <sup>1</sup>                          | Section 3.2 Next-step drug treatment options | <i>Summary: There is a lack of direct evidence for the efficacy of increasing the dose after initial treatment non-response. Indirect evidence suggests there is a dose response for TCAs, venlafaxine and escitalopram (II) but not for other SSRIs.</i>                                                                                                                                                                                                                                                                                                            |
|                                                                                        | Section 3.2.1 Dose Increase (C)              | <i>The evidence supporting the efficacy of dose increase is limited, but it could be considered in individual patients especially if:</i> <ul style="list-style-type: none"> <li><i>there are minimal side-effects (D) and/or,</i></li> <li><i>there has been some improvement on the antidepressant (D) and/or, the current antidepressant has a possible dose response (there is modest evidence for venlafaxine, escitalopram and TCAs) (C).</i></li> </ul>                                                                                                       |
| Royal Australian and New Zealand College of Psychiatrists (2015) <sup>2</sup>          | Page 1108-1109                               | <b><i>An adequate trial of an antidepressant should be a minimum of three weeks at the recommended therapeutic dose.</i></b> <i>Note, some antidepressants require titration to the maximum recommended dose, whereas others, in particular SSRIs, generally have a flat dose-response curve and high doses do not necessarily improve efficacy.</i>                                                                                                                                                                                                                 |
| <b>Guidelines lacking clarity regarding dose-response effects</b>                      |                                              |                                                                                                                                                                                                                                                                                                                                                                                                                                                                                                                                                                      |
| National Institute for Health and Care Excellence CG90 (Sept 2019 Update) <sup>3</sup> | Section 10.15.4.4                            | <i>If response is absent or minimal after 3 to 4 weeks of treatment with a therapeutic dose of an antidepressant, increase the level of support (for example, by weekly face-to-face or telephone contact) and consider:</i> <ul style="list-style-type: none"> <li><i>increasing the dose in line with the Summary of Product Characteristics if there are no significant side effects or if the person prefers.</i></li> </ul>                                                                                                                                     |
|                                                                                        | Section 12.3.1                               | <i>When depression does not respond adequately, a common treatment strategy is to increase the dose of the antidepressant within the licensed dosage range. There is little objective evidence to support higher response rates with increasing dose (within the licensed dosage range) for the majority of antidepressants, but this does not preclude the possibility of a beneficial effect being seen in individual patients. Any beneficial effect is likely to be at least partially determined by individual differences in hepatic metabolising enzymes.</i> |
|                                                                                        | Section 12.3.2                               | <i>Approximately 20 to 30% of patients with depression do not respond to the first antidepressant prescribed (assuming an adequate dose, duration of treatment and compliance with medication; Cowen, 1998). It is normal clinical practice at this point to increase the dose to the maximum tolerated (within licensed limits; see section 12.3.1) and, if there is still no or minimal response, to switch to an alternative antidepressant.</i>                                                                                                                  |
|                                                                                        | Section 12.3.13                              | <i>The evidence for effective strategies in people whose depression has not responded adequately to treatment is not strong. A common first-line strategy, increasing the dose, is also not supported by convincing evidence of effectiveness, although this strategy may well be effective in some people, particularly if they have been able to tolerate the drug at the initial dose.</i>                                                                                                                                                                        |

---

**Guidelines lacking clarity regarding dose-response effects (Continued)**


---

|                                                                                   |                               |                                                                                                                                                                                                                                                                                                                                                                                                                                                                                                                                                                                                                                                                                                                                                                                                                                                                                                                                                             |
|-----------------------------------------------------------------------------------|-------------------------------|-------------------------------------------------------------------------------------------------------------------------------------------------------------------------------------------------------------------------------------------------------------------------------------------------------------------------------------------------------------------------------------------------------------------------------------------------------------------------------------------------------------------------------------------------------------------------------------------------------------------------------------------------------------------------------------------------------------------------------------------------------------------------------------------------------------------------------------------------------------------------------------------------------------------------------------------------------------|
| National Institute for Health and Care Excellence NG 222 (June 2022) <sup>4</sup> | Section 1.9.5                 | <p><i>If a person's depression has had no or a limited response to treatment with antidepressant medication alone, and no obvious cause can be found and resolved, discuss further treatment options with the person and make a shared decision on how to proceed based on their clinical need and preferences. Options include [a range of options are listed]:</i></p> <ul style="list-style-type: none"> <li>• <i>continuing antidepressant therapy by either increasing the dose or changing the drug. For example, by:</i> <ul style="list-style-type: none"> <li>○ <i>increasing the dose of the current medication (within the licensed dose range) if the medication is well tolerated; be aware that higher doses of antidepressants may not be more effective and can increase the frequency and severity of side effects; ensure follow-up and frequent monitoring of symptoms and side effects after dose increases.</i></li> </ul> </li> </ul> |
|                                                                                   | Section 1.9.6                 | <p><i>If a person's depression has had no or a limited response to treatment with a combination of antidepressant medication and psychological therapy, discuss further treatment options with the person and make a shared decision on how to proceed based on their clinical need and preferences. Options include [a range of options are listed]:</i></p> <p><i>increasing the dose or switching to another antidepressant (see recommendation 1.9.5)</i></p>                                                                                                                                                                                                                                                                                                                                                                                                                                                                                           |
| American Psychiatric Association (2010) <sup>5</sup>                              | Quick reference guide page 18 | <p><i>The initial dose should be raised incrementally as tolerated until a therapeutic dose is reached or the patient achieves remission. Titration generally can be accomplished over initial weeks, but more time may be needed depending on development of side effects, the patient's age, and the presence of co-occurring medical and psychiatric conditions.</i></p>                                                                                                                                                                                                                                                                                                                                                                                                                                                                                                                                                                                 |
|                                                                                   | Quick reference guide page 21 | <p><b><i>Address inadequate response. Maximizing the Initial Treatment</i></b></p> <p><b><i>Patients Treated With an Antidepressant:</i></b></p> <ul style="list-style-type: none"> <li>• <i>Optimizing (i.e., raising) the dose is a reasonable first step if side-effect burden is tolerable, especially if the upper dosage limit has not yet been reached.</i></li> </ul> <p><i>Some patients may require doses higher than those approved by the Food and Drug Administration.</i></p>                                                                                                                                                                                                                                                                                                                                                                                                                                                                 |
| Canadian Network for Mood and Anxiety Treatments (CANMAT) (2016) <sup>6</sup>     | Section 3.14                  | <p><b><i>How Long Do You Wait for a Response from an Antidepressant?</i></b></p> <p><i>CANMAT recommends increasing the antidepressant dose for nonimprovers at 2 to 4 weeks if the medication is tolerated and switching to another antidepressant if tolerability is a problem.</i></p>                                                                                                                                                                                                                                                                                                                                                                                                                                                                                                                                                                                                                                                                   |
|                                                                                   | Section 3.16                  | <p><b><i>How Do You Manage Inadequate Response to an Antidepressant?</i></b></p> <p><i>If a patient has partial (e.g., 25%-49% reduction in symptom scores) or no response (e.g., &lt;25% reduction) to the initial treatment, clinicians should ensure the treatment is optimized. There is substantial evidence that many patients receive subtherapeutic doses and/or inadequate duration of treatment, and up to 20% may have poor adherence.</i></p>                                                                                                                                                                                                                                                                                                                                                                                                                                                                                                   |

---

1. Cleare A, Pariante CM, Young AH, et al. Evidence-based guidelines for treating depressive disorders with antidepressants: A revision of the 2008 British Association for Psychopharmacology guidelines. *Journal of Psychopharmacology* 2015;29(5):459-525. doi: 10.1177/0269881115581093
2. Malhi GS, Bassett D, Boyce P, et al. Royal Australian and New Zealand College of Psychiatrists clinical practice guidelines for mood disorders. *Australian and New Zealand Journal of Psychiatry* 2015;49(12):1087-206.
3. National Institute for Health and Care Excellence. Clinical Guideline 90: The treatment and management of depression in adults (Updated edition 2019), 2019.
4. National Institute for Health and Care Excellence. National Guideline 222: Depression in adults: treatment and management (June 2022), 2022.
5. Gelenberg AJ, Freeman MP, Markowitz JC, et al. Practice guideline for the treatment of patients with major depressive disorder. Washington DC: American Psychiatric Association 2010.
6. Kennedy SH, Lam RW, McIntyre RS, et al. Canadian Network for Mood and Anxiety Treatments (CANMAT) 2016 clinical guidelines for the management of adults with major depressive disorder: Section 3. Pharmacological Treatments. *Canadian Journal of Psychiatry* 2016;61(9):540-60.

## Search strategies

### Embase 1975 to 2021

|    | Searches                                                               | Results |
|----|------------------------------------------------------------------------|---------|
| 1  | systematic review\$.mp. or exp "systematic review"/                    | 422957  |
| 2  | meta analysis/                                                         | 233016  |
| 3  | dose-response.mp. or exp dose response/                                | 459419  |
| 4  | 1 or 2 or 3                                                            | 965431  |
| 5  | antidepressants\$.mp. or exp antidepressant agent/                     | 522746  |
| 6  | ssri.mp. or exp serotonin uptake inhibitor/                            | 291876  |
| 7  | exp serotonin uptake inhibitor/ or selective serotonin inhibitor\$.mp. | 291324  |
| 8  | citalopram.mp. or exp citalopram/                                      | 24483   |
| 9  | escitalopram.mp. or exp escitalopram/                                  | 13786   |
| 10 | fluoxetine.mp. or exp fluoxetine/                                      | 50458   |
| 11 | fluxetine.mp.                                                          | 33      |
| 12 | fluvoxamine.mp. or exp fluvoxamine maleate/ or exp fluvoxamine/        | 14665   |
| 13 | paroxetine.mp. or exp paroxetine/                                      | 29256   |
| 14 | sertraline.mp. or exp sertraline/                                      | 28225   |
| 15 | 5 or 6 or 7 or 8 or 9 or 10 or 11 or 12 or 13 or 14                    | 524221  |
| 16 | 4 and 15                                                               | 41674   |
| 17 | depression.mp. or exp depression/ or exp major depression/             | 789628  |
| 18 | major depressive disorder.mp. or exp major depression/                 | 79382   |
| 19 | unipolar depression.mp.                                                | 4133    |
| 20 | 17 or 18 or 19                                                         | 790950  |
| 21 | 16 and 20                                                              | 12630   |
| 22 | limit 21 to human                                                      | 10975   |
| 23 | limit 22 to english language                                           | 10408   |
| 24 | limit 23 to yr="1975 - 2021"                                           | 10375   |

**Ovid Medline (R) All 1975 to 2021**

|    | <b>Searches</b>                                                        | <b>Results</b> |
|----|------------------------------------------------------------------------|----------------|
| 1  | systematic review\$.mp.                                                | 257991         |
| 2  | meta-analysis.mp. or exp Meta-Analysis/                                | 232434         |
| 3  | exp Dose-Response Relationship, Drug/ or dose response.mp.             | 527175         |
| 4  | 1 or 2 or 3                                                            | 893529         |
| 5  | Antidepressant\$.mp. or exp Antidepressive Agents/                     | 181670         |
| 6  | exp Serotonin Uptake Inhibitors/ or ssri.mp.                           | 46233          |
| 7  | selective serotonin inhibitor\$.mp.                                    | 31             |
| 8  | citalopram.mp. or exp Citalopram/                                      | 7401           |
| 9  | escitalopram.mp.                                                       | 2836           |
| 10 | fluoxetine.mp. or exp Fluoxetine/                                      | 14859          |
| 11 | fluxetine.mp.                                                          | 7              |
| 12 | fluvoxamine.mp. or exp Fluvoxamine/                                    | 3104           |
| 13 | paroxetine.mp. or exp Paroxetine/                                      | 6572           |
| 14 | sertraline.mp. or exp Sertraline/                                      | 5592           |
| 15 | 5 or 6 or 7 or 8 or 9 or 10 or 11 or 12 or 13 or 14                    | 197756         |
| 16 | 4 and 15                                                               | 18050          |
| 17 | depression.mp. or exp Depression/                                      | 445870         |
| 18 | exp Depressive Disorder/ or exp Depressive Disorder, Major/ or mdd.mp. | 120528         |
| 19 | unipolar depression.mp.                                                | 2915           |
| 20 | 17 or 18 or 19                                                         | 479550         |
| 21 | 16 and 20                                                              | 6916           |
| 22 | limit 21 to humans                                                     | 5337           |
| 23 | limit 22 to english language                                           | 4997           |
| 24 | limit 23 to yr="1975 - 2021"                                           | 4973           |

**Embase, Ovid Medline (R) All, and PsychInfo 1975 to 2021**

|    | <b>Searches</b>                                                                                                                   | <b>Results</b> |
|----|-----------------------------------------------------------------------------------------------------------------------------------|----------------|
| 1  | Systematic review.mp. [mp=ti, ab, hw, tn, ot, dm, mf, dv, kf, fx, dq, nm, ox, px, rx, ui, sy, tc, id, tm]                         | 688896         |
| 2  | meta-analysis.mp. [mp=ti, ab, hw, tn, ot, dm, mf, dv, kf, fx, dq, nm, ox, px, rx, ui, sy, tc, id, tm]                             | 611577         |
| 3  | dose-response.mp. [mp=ti, ab, hw, tn, ot, dm, mf, dv, kf, fx, dq, nm, ox, px, rx, ui, sy, tc, id, tm]                             | 977707         |
| 4  | 1 or 2 or 3                                                                                                                       | 1951504        |
| 5  | citalopram.mp. [mp=ti, ab, hw, tn, ot, dm, mf, dv, kf, fx, dq, nm, ox, px, rx, ui, sy, tc, id, tm]                                | 35516          |
| 6  | escitalopram.mp. [mp=ti, ab, hw, tn, ot, dm, mf, dv, kf, fx, dq, nm, ox, px, rx, ui, sy, tc, id, tm]                              | 18398          |
| 7  | fluoxetine.mp. [mp=ti, ab, hw, tn, ot, dm, mf, dv, kf, fx, dq, nm, ox, px, rx, ui, sy, tc, id, tm]                                | 45             |
| 8  | fluoxetine.mp. [mp=ti, ab, hw, tn, ot, dm, mf, dv, kf, fx, dq, nm, ox, px, rx, ui, sy, tc, id, tm]                                | 72941          |
| 9  | fluvoxamine.mp. [mp=ti, ab, hw, tn, ot, dm, mf, dv, kf, fx, dq, nm, ox, px, rx, ui, sy, tc, id, tm]                               | 19567          |
| 10 | paroxetine.mp. [mp=ti, ab, hw, tn, ot, dm, mf, dv, kf, fx, dq, nm, ox, px, rx, ui, sy, tc, id, tm]                                | 39506          |
| 11 | sertraline.mp. [mp=ti, ab, hw, tn, ot, dm, mf, dv, kf, fx, dq, nm, ox, px, rx, ui, sy, tc, id, tm]                                | 37117          |
| 12 | ssri.mp. [mp=ti, ab, hw, tn, ot, dm, mf, dv, kf, fx, dq, nm, ox, px, rx, ui, sy, tc, id, tm]                                      | 23575          |
| 13 | serotonin uptake inhibitor\$.mp. [mp=ti, ab, hw, tn, ot, dm, mf, dv, kf, fx, dq, nm, ox, px, rx, ui, sy, tc, id, tm]              | 78664          |
| 14 | selective serotonin re-uptake inhibitor\$.mp. [mp=ti, ab, hw, tn, ot, dm, mf, dv, kf, fx, dq, nm, ox, px, rx, ui, sy, tc, id, tm] | 2129           |
| 15 | 5 or 6 or 7 or 8 or 9 or 10 or 11 or 12 or 13 or 14                                                                               | 185018         |
| 16 | depression.mp. [mp=ti, ab, hw, tn, ot, dm, mf, dv, kf, fx, dq, nm, ox, px, rx, ui, sy, tc, id, tm]                                | 1549267        |

|    |                                                                                                                   |         |
|----|-------------------------------------------------------------------------------------------------------------------|---------|
| 17 | major depressive disorder.mp. [mp=ti, ab, hw, tn, ot, dm, mf, dv, kf, fx, dq, nm, ox, px, rx, ui, sy, tc, id, tm] | 88507   |
| 18 | major depression.mp. [mp=ti, ab, hw, tn, ot, dm, mf, dv, kf, fx, dq, nm, ox, px, rx, ui, sy, tc, id, tm]          | 252537  |
| 19 | unipolar depression.mp. [mp=ti, ab, hw, tn, ot, dm, mf, dv, kf, fx, dq, nm, ox, px, rx, ui, sy, tc, id, tm]       | 10391   |
| 20 | 16 or 17 or 18 or 19                                                                                              | 1561530 |
| 21 | 4 and 15 and 20                                                                                                   | 10272   |
| 22 | limit 21 to humans                                                                                                | 9167    |
| 23 | limit 22 to english language                                                                                      | 8732    |
| 24 | limit 23 to yr="1975 - 2021"                                                                                      | 8728    |



**Table S2 – Characteristics of reviews meeting inclusion criteria**

| Study                       | Indication          | Number of primary studies included | Review design        | Efficacy & Dose                                                                          | ADEs & dropouts                                               | Protocol | Placebo included | Patient level | Flexible dose studies included | Does Standardisation                                                         | Study duration                   | Primary or secondary care |
|-----------------------------|---------------------|------------------------------------|----------------------|------------------------------------------------------------------------------------------|---------------------------------------------------------------|----------|------------------|---------------|--------------------------------|------------------------------------------------------------------------------|----------------------------------|---------------------------|
| Adli 2005 <sup>1</sup>      | Major depression    | 12                                 | Syst. Narr.          | ↑ fluv.<br>↔ cit, fluox, par, sert                                                       | ↑                                                             | Unclear  | Yes              | No            | Reported separately            | Study doses used                                                             | 4-8 wks                          | Unclear                   |
| Altamura 1988 <sup>2</sup>  | Depression          | 2                                  | Narr.                | ↔ fluox                                                                                  | ↑                                                             | No       | Yes              | No            | No                             | Fluox dose                                                                   | 6 wks                            | Outpatients               |
| Baker 2003 <sup>3</sup>     | Major depression    | 4                                  | Syst. M-A.           | ? fluox, par, sert                                                                       | ↑                                                             | No       | No               | No            | Reported separately            | Yes: Low, Medium, High.<br>No clear definition                               | ≤8 wks                           | Unclear                   |
| Barbui 2002 <sup>4</sup>    | Depression          | 103                                | Syst. M-A.           | ↑ fluox                                                                                  | ↑                                                             | No       | No               | No            | Yes                            | Yes: 20-30mg/d, >30mg/d. Dose range 20-40mg/d & >40mg/d                      | ≤9 wks                           | Both                      |
| Beasley 1990 <sup>5</sup>   | MDD                 | Pooled (n=669)                     | Pooled. Not Syst.    | ↔ fluox                                                                                  | ↑                                                             | No       | Yes              | No            | Yes                            | Fluox dose                                                                   | ≤8 wks                           | Outpatients               |
| Beasley 1993 <sup>6</sup>   | MDD                 | 3                                  | Narr.                | n-a                                                                                      | fluox: ↑ anxiety, agitation, insomnia., drowsiness, asthenia. | No       | Yes              | Yes           | Yes                            | None                                                                         | 6 wks                            | Primary care              |
| Benkert 1996 <sup>7</sup>   | MDD                 | 7 (+7 Rev)                         | Narr.                | ↔ cit, fluox, fluv, par, sert                                                            | n-a                                                           | No       | Yes              | No            | Yes                            | Actual doses from other reviews                                              | Not defined                      | Not defined               |
| Berney 2005 <sup>8</sup>    | Depression          | 14 (+4 Revs)                       | Narr.                | ↔ cit, escit, fluox, par, sert.<br>? fluv                                                | ↑ fluox, dropout <sup>a</sup>                                 | No       | Yes              | No            | No                             | Study doses used                                                             | 6-8 wks                          | Both                      |
| Bollini 1999 <sup>9</sup>   | Depression          | 33                                 | Syst. M-A.           | ∩ curvy linear SSRI & non-SSRI grouped                                                   | ↑                                                             | Unclear  | Yes              | No            | Yes                            | Imp Equiv                                                                    | 6 wks (4-24 wks)                 | Unclear                   |
| Braun 2020 <sup>10</sup>    | Depressive disorder | 33                                 | Syst. M-A. Net-M-A   | ↔ SSRI grouped<br>↔ cit, escit, fluox, fluvox par, sert                                  | ↑ SSRI grouped                                                | Yes      | Yes              | No            | Yes                            | Low, Med, High.                                                              | 6 wks (2-12 wks)                 | Unclear                   |
| Caley 2002 <sup>11</sup>    | Depression          | 5 (+7 Revs)                        | Narr.                | ↑ cit, ∩ fluv, ↔ fluox, sert, ?par                                                       | ↑                                                             | No       | Yes              | No            | Yes                            | Study doses used                                                             | 4-6 wks                          | Both                      |
| Cheng <sup>12</sup>         | Major depression    | 115                                | Model-Bases M-A      | ↔ cit, escit, fluox, fluvox par, sert                                                    | n-a                                                           | No       | Yes              | No            | No                             | Fluox Equiv                                                                  | 4-12wks                          | Both                      |
| Corruble 2000 <sup>13</sup> | Depression          | 10 (+6 Revs)                       | Syst. Narr.          | SSRI grouped                                                                             | n-a                                                           | No       | No               | No            | No                             | SSRI study doses used                                                        | 4-8 wks                          | Unclear                   |
| Dold 2017 <sup>14</sup>     | Unipolar depression | 5                                  | Syst. M-A. M-R       | ↔ fluox, par, sert                                                                       | ↑fluox,                                                       | No       | No               | No            | Rand. fixed v increased dose   | Standard dose: fluox, par 20mg/d, sert 50mg/d, versus higher doses           | 5 wks (3-8 wks)                  | Unclear                   |
| Dunner 1992 <sup>15</sup>   | Depression          | Pooled (n=460)                     | Pooled SKB data only | ↔ Par                                                                                    | n-a                                                           | No       | Yes              | Yes           | Yes                            | Par. dose                                                                    | Acute ≤6 wks<br>Long-term 52 wks | Unclear                   |
| Furukawa 2019 <sup>16</sup> | Major depression    | 66                                 | Syst. M-A            | ↑ SSRI grouped ( to 40mg/d)<br>↑ cit (to 30mg/d), ↔ escit, fluox, par, ∩ sert.           | ↑                                                             | Yes      | Yes              | No            | No                             | Fluox Equiv                                                                  | 8 wks (4-12wks)                  | Both                      |
| Furukawa 2020 <sup>17</sup> | Major depression    | 108                                | Syst. M-A            | ↔ SSRI grouped<br>↔ cit, escit, fluox, par, sert                                         | ↑ flexible dose                                               | Yes      | Yes              | No            | Fixed v flex dosing            | Fluox Equiv                                                                  | 7 wks (4-12 wks)                 | Both                      |
| Gutmiedl 2020 <sup>18</sup> | MDD                 | 44                                 | Syst. M-A. M-R       | ↔ SSRIs & non-SSRI grouped                                                               | n-a                                                           | Yes      | Yes              | Yes           | Yes                            | Fluox Equiv                                                                  | 9 wks (4-26 wks)                 | Both                      |
| Hansen 2009 <sup>19</sup>   | Depression          | 74                                 | Syst. M-A. M-R       | ↑ SSRIs & non-SSRI grouped                                                               | n-a                                                           | No       | Yes              | No            | Yes                            | Yes: licensed dose range e.g. fluox <45mg/d low >45mg/d high                 | 7 wks (6-24 wks)                 | Outpatients               |
| Hamza 2021 <sup>20</sup>    | MDD                 | 60                                 | M-A                  | SSRI grouped (↑ to 40mg/d)<br>↑ cit (to 30mg/d), par, sert (to 75mg/d), ↔ escit, fluox., | n-a                                                           | No       | Yes              | No            | No                             | Fluox Equiv.<br>Individual drug effects as fluox equiv not actual drug dose. | 8 wks (4-12wks)                  | Both                      |

## Review characteristics – continued

| Study                         | Indication                | Number of primary studies included | Review design           | Efficacy & Dose                                                    | ADEs & dropouts       | Protocol | Placebo included | Patient-level | Flexible dose studies included | Does Standardisation                                                                                                             | Study duration (range)               | Primary or secondary care |      |
|-------------------------------|---------------------------|------------------------------------|-------------------------|--------------------------------------------------------------------|-----------------------|----------|------------------|---------------|--------------------------------|----------------------------------------------------------------------------------------------------------------------------------|--------------------------------------|---------------------------|------|
| Hieronimus 2016 <sup>21</sup> | Depression                | 11                                 | M-A. Ind. Data.         | ↑ cit, par, sert                                                   | n-a                   | Yes      | Yes              | Yes           | Yes                            | Patient-level doses                                                                                                              | ≤6 wks                               | Unclear                   |      |
| Holper 2020 <sup>22</sup>     | MDD                       | 153                                | Net-M-A                 | ↑ escital, fluox, ↔ cit, par                                       | ↑ (≤70y)<br>↑↑ (>70y) | Yes      | Yes              | No            | Yes                            | Fluox Equiv                                                                                                                      | 4-12 wks                             | Both                      |      |
| Jakubovski 2016 <sup>23</sup> | MDD                       | 40                                 | Syst. M-A.              | ↑ SSRIs grouped                                                    | ↑                     | Unclear  | Yes              | No            | Yes                            | Imip Equiv                                                                                                                       | 6 wks<br>(4-24 wks)                  | Unclear                   |      |
| Jenner 1992 <sup>24</sup>     | Depression                | Pooled (n=4668)                    | Pooled. SKB data only   | ↔ par                                                              | ↑                     | No       | Yes              | Yes           | Reported separately            | Par. dose                                                                                                                        | Mostly 6 wks (≤2 yr)                 | Both                      |      |
| Khan 2003 <sup>25</sup>       | MDD                       | 36                                 | FDA submissions M-A     | ↔ SSRIs & non-SSRI grouped                                         | ↑                     | No       | Yes              | No            | Reported separately            | SSRI study doses used                                                                                                            | 6-8wks                               | Unclear                   |      |
| Klemp 2011 <sup>26</sup>      | Depression                | 26                                 | Syst. M-R.              | ↔ par                                                              | n-a                   | No       | Yes              | No            | Yes                            | Par dose                                                                                                                         | 8 wks<br>(6-56 wks)                  | Outpatients               |      |
| Lam 2006 <sup>27</sup>        | MDD                       | 3                                  | M-A. Lundbeck data only | ↔ escital                                                          | n-a                   | No       | Yes              | No            | Yes                            | Escit dose                                                                                                                       | 8 wks                                | Both                      |      |
| Lane 1995 <sup>28</sup>       | Depression                | 5 (+2 Revs)                        | Narr.                   | ↔ cit, fluox, par, sert                                            | ↑                     | No       | Yes              | Not defined   | Yes                            | Not defined                                                                                                                      | Not defined                          | Not defined               |      |
| Montgomery 1994 <sup>29</sup> | Depression                | 9                                  | M-A. Not Syst.          | ↔ cit                                                              | n-a                   | No       | Yes              | No            | Yes                            | Cit dose                                                                                                                         | 4-6 wks                              | Unclear                   |      |
| Montgomery 1995 <sup>30</sup> | Depression                | 1                                  | Narr.                   | ↔ sert                                                             | ↑                     | No       | Yes              | No            | No                             | Sert dose                                                                                                                        | Acute<br>6-8 wks<br>Long-term 44 wks | Not defined               |      |
| Montgomery 1995 <sup>31</sup> | Depression                | 2 (+2 Revs)                        | Narr.                   | ↔ cit                                                              | n-a                   | No       | Yes              | No            | Yes                            | Cit dose                                                                                                                         | ≤24 wks                              | Both                      |      |
| Murdoch 2005 <sup>32</sup>    | MDD                       | Pooled (n=1307)                    | Pooled Lundbeck Forrest | n-a                                                                | ↑ escital             | No       | Yes              | No            | Yes                            | Escit dose                                                                                                                       | Not defined                          | Not defined               |      |
| Oliva 2021 <sup>33</sup>      | MDD                       | Not defined                        | Syst. M-A.              | n-a                                                                | ↑ N&V cit, escital    | Yes      | Yes              | No            | Unclear                        | Low v high dose                                                                                                                  | 6-12 wks                             | Not defined               |      |
| Papakostas 2010 <sup>34</sup> | MDD                       | 9                                  | Syst. M-A.              | ↑ SSRIs grouped                                                    | ↑                     | No       | Yes              | No            | Yes                            | Usual dose (10mg/d escit, 20mg/d cit, fluox, par, 50mg/d sert, fluov), intermediate, double (double usual) & higher.<br>Cit dose | 6 wks                                | Not defined               |      |
| Parker 2000 <sup>35</sup>     | Depression                | 1 (+1 Rev)                         | Narr.                   | ↑ cit                                                              | ↑                     | No       | Yes              | No            | Yes                            | Cit dose                                                                                                                         | 4-6 wks                              | Not defined               |      |
| Purgato 2015 <sup>36</sup>    | Unipolar major depression | 173                                | Syst. M-R.              | ↔ fluox                                                            | n-a                   | No       | Yes              | No            | Yes                            | Yes: Mean doses poorly reported: min and max doses to DDDs then PDD/DDD. Grouped: ≤20mg/d or 20-80mg/d                           | Sert dose                            | Majority ≤6 wks           | Both |
| Preskorn 1995 <sup>37</sup>   | Depression                | 3                                  | Narr.                   | ↔ sert                                                             | ↑                     | No       | Yes              | No            | No                             | Sert dose                                                                                                                        | ≤8 wks                               | Outpatients               |      |
| Rifkin 1997 <sup>38</sup>     | Depression                | 4                                  | Narr.                   | ↔ fluox, par, sert                                                 | n-a                   | No       | Yes              | No            | No                             | SSRI study doses used                                                                                                            | Not defined                          | Not defined               |      |
| Ruhe 2006 <sup>39</sup>       | Depression                | 8                                  | Syst. Narr.             | ↔ cit, fluox, par, sert ∩ fluov,                                   | n-a                   | Unclear  | No               | No            | Yes                            | SSRI study doses used                                                                                                            | 8 wks<br>(3-12 wks)                  | Unclear                   |      |
| Safer 2016 <sup>40</sup>      | MDD & other MH conditions | 33                                 | Narr.                   | ↔ SSRI & non-SSRI grouped<br>↔ cit, escit, fluox, fluov, par, sert | ↑                     | No       | Yes              | No            | No                             | SSRI study doses used                                                                                                            | 8-28 wks                             | Not defined               |      |

## Review characteristics – continued

| Study                      | Indication                | Number of primary studies included | Review design | Efficacy & Dose                                | ADEs & dropouts | Protocol | Placebo included | Patient-level | Flexible dose studies included | Does Standardisation | Study duration (range) | Primary or secondary care |
|----------------------------|---------------------------|------------------------------------|---------------|------------------------------------------------|-----------------|----------|------------------|---------------|--------------------------------|----------------------|------------------------|---------------------------|
| Tan 1999 <sup>41</sup>     | MDD & other MH conditions | 2 (+1 Rev)                         | Narr.         | ?cit                                           | ↑               | No       | Yes              | No            | Yes                            | Cit dose             | 6 wks (3-24 wks)       | Not defined               |
| Vaswani 2003 <sup>42</sup> | MDD & other MH conditions | 3 (+5 Revs)                        | Narr.         | ↑ cit (to 40mg/d),<br>↔ fluox, fluv, par, sert | ↑               | No       | Yes              | Not defined   | Yes                            | Not defined          | Not defined            | Not defined               |

**References:**

1. Adli M, Baethge C, Heinz A, et al. Is dose escalation of antidepressants a rational strategy after a medium-dose treatment has failed? A systematic review. *European Archives of Psychiatry & Clinical Neuroscience* 2005;255(6):387-400.
2. Altamura AC, Montgomery SA, Wernicke JF. The evidence for 20mg a day of fluoxetine as the optimal dose in the treatment of depression. *British Journal of Psychiatry* 1988;153(Suppl 3):109-12.
3. Baker CB, Tweedie R, Duval S, et al. Evidence that the SSRI dose response in treating major depression should be reassessed: A meta-analysis. *Depression and Anxiety* 2003;17(1):1-9. doi: 10.1002/da.10079
4. Barbui C, Hotopf M, Garattini S. Fluoxetine dose and outcome in antidepressant drug trials. *European Journal of Clinical Pharmacology* 2002;58(6):379-86.
5. Beasley Jr CM, Bosomworth JC, Wernicke JF. Fluoxetine: Relationships among dose, response, adverse events, and plasma concentrations in the treatment of depression. *Psychopharmacology Bulletin* 1990;26(1):18-24.
6. Beasley CMJ, Potvin JH. Fluoxetine: Activating and sedating effects. *International Clinical Psychopharmacology* 1993;8(4):271-75.
7. Benkert O, Szegedi A, Wetzel H. Minimum effective dose for antidepressants - An obligatory requirement for antidepressant drug evaluation? *International Clinical Psychopharmacology* 1996;11(3):177-85.
8. Berney P. Dose-response relationship of recent antidepressants in the short-term treatment of depression. *Dialogues in Clinical Neuroscience* 2005;7(3):249-62.
9. Bollini P, Pampallona S, Tibaldi G, et al. Effectiveness of antidepressants. Meta-analysis of dose-effect relationships in randomised clinical trials. *British Journal of Psychiatry* 1999;174:297-303.
10. Braun C, Adams A, Rink L, et al. In search of a dose-response relationship in SSRIs-a systematic review, meta-analysis, and network meta-analysis. *Acta Psychiatrica Scandinavica* 2020;142(6):430-42.
11. Caley CF, Kando JC. SSRI efficacy-finding the right dose. *Journal of Psychiatric Practice* 2002;8(1):33-40.
12. Cheng Q, Huang J, Xu L, et al. Analysis of time-course, dose-effect, and influencing factors of antidepressants in the treatment of acute adult patients with major depression. *International Journal of Neuropsychopharmacology* 2020;23(2):76-87.
13. Corruble E, Guelfi JD. Does increasing dose improve efficacy in patients with poor antidepressant response: a review. *Acta Psychiatrica Scandinavica* 2000;101(5):343-48.
14. Dold M, Bartova L, Rupprecht R, et al. Dose Escalation of Antidepressants in Unipolar Depression: A Meta-Analysis of Double-Blind, Randomized Controlled Trials. *Psychotherapy and Psychosomatics* 2017;86(5):283-91.
15. Dunner DL, Dunbar GC. Optimal dose regimen for paroxetine. *Journal of Clinical Psychiatry* 1992;53(Suppl):21-26.
16. Furukawa TA, Cipriani A, Cowen PJ, et al. Optimal dose of selective serotonin reuptake inhibitors, venlafaxine, and mirtazapine in major depression: a systematic review and dose-response meta-analysis. *Lancet Psychiatry* 2019;6(7):601-09. doi: [https://doi.org/10.1016/S2215-0366\(19\)30217-2](https://doi.org/10.1016/S2215-0366(19)30217-2)
17. Furukawa TA, Salanti G, Cowen PJ, et al. No benefit from flexible titration above minimum licensed dose in prescribing antidepressants for major depression: systematic review. *Acta Psychiatrica Scandinavica* 2020;141(5):401-09.

18. Gutsmedl K, Krause M, Bighelli I, et al. How well do elderly patients with major depressive disorder respond to antidepressants: A systematic review and single-group meta-analysis. *BMC Psychiatry* 2020;20(1)
19. Hansen RA, Moore CG, Dusetzina SB, et al. Controlling for drug dose in systematic review and meta-analysis: A case study of the effect of antidepressant dose. *Medical Decision Making* 2009;29(1):91-103.
20. Hamza T, Cipriani A, Furukawa TA, et al. A Bayesian dose-response meta-analysis model: A simulations study and application. *Statistical Methods in Medical Research* 2021;30(5):1358-72.
21. Hieronymus F, Nilsson S, Eriksson E. A mega-analysis of fixed-dose trials reveals dose-dependency and a rapid onset of action for the antidepressant effect of three selective serotonin reuptake inhibitors. *Translational Psychiatry* 2016;6:e834. doi: doi:10.1038/tp.2016.104
22. Holper L. Optimal doses of antidepressants in dependence on age: Combined covariate actions in Bayesian network meta-analysis. *EClinicalMedicine* 2020;18:100219.
23. Jakubovski E, Varigonda AL, Freemantle N, et al. Systematic Review and Meta-Analysis: Dose-Response Relationship of Selective Serotonin Reuptake Inhibitors in Major Depressive Disorder. *American Journal of Psychiatry* 2016;173(2):174-83. doi: 10.1176/appi.ajp.2015.15030331
24. Jenner PN. Paroxetine: an overview of dosage, tolerability, and safety. *International Clinical Psychopharmacology* 1992;6(Suppl 4):69-80.
25. Khan A, Khan SR, Walens G, et al. Frequency of positive studies among fixed and flexible dose antidepressant clinical trials: an analysis of the food and drug administration summary basis of approval reports. *Neuropsychopharmacology* 2003;28(3):552-57.
26. Klemp M, Tvette IF, Gasemyr J, et al. Meta-regression analysis of paroxetine clinical trial data: does reporting scale matter? *Journal of Clinical Psychopharmacology* 2011;31(2):201-06.
27. Lam RW, Andersen HF. The influence of baseline severity on efficacy of escitalopram and citalopram in the treatment of major depressive disorder: An extended analysis. *Pharmacopsychiatry* 2006;39(5):180-84.
28. Lane R, Baldwin D, Preskorn S. The SSRIs: advantages, disadvantages and differences. *Journal of Psychopharmacology* 1995;9(Suppl 2):163-78.
29. Montgomery SA, Pedersen V, Tanghøj P, et al. The optimal dosing regimen for citalopram: A meta-analysis of nine placebo-controlled studies. *International Clinical Psychopharmacology* 1994;9(Suppl 1):35-40.
30. Montgomery S. Serotonin, sertraline and depression. *Journal of Psychopharmacology* 1995;9(Suppl 2):179-84.
31. Montgomery SA. Selecting the optimum therapeutic dose of serotonin reuptake inhibitors: Studies with citalopram. *International Clinical Psychopharmacology* 1995;10(SUPPL. 1):23-27.
32. Murdoch D, Keam SJ. Escitalopram: A review of its use in the management of major depressive disorder. *Drugs* 2005;65(16):2379-404.
33. Oliva V, Lippi M, Paci R, et al. Gastrointestinal side effects associated with antidepressant treatments in patients with major depressive disorder: A systematic review and meta-analysis. *Progress in Neuro-Psychopharmacology and Biological Psychiatry* 2021;109 (no pagination)
34. Papakostas GI, Charles D, Fava M. Are typical starting doses of the selective serotonin reuptake inhibitors sub-optimal? A meta-analysis of randomized, double-blind,

- placebo-controlled, dose-finding studies in major depressive disorder. *World Journal of Biological Psychiatry* 2010;11(2 (Part 2)):300-2007.
35. Parker NG, Brown CS. Citalopram in the treatment of depression. *Annals of Pharmacotherapy* 2000;34(6):761-71.
  36. Purgato M, Gastaldon C, Papola D, et al. Drug dose as mediator of treatment effect in antidepressant drug trials: The case of fluoxetine. *Acta Psychiatrica Scandinavica* 2015;131(6):408-16.
  37. Preskorn SH, Lane RM. Sertraline 50 mg daily: the optimal dose in the treatment of depression. *International Clinical Psychopharmacology* 1995;10(3):129-41.
  38. Rifkin A. SSRI optimal dose remains at issue. *Journal of Clinical Psychiatry* 1997;58(2):87-88.
  39. Ruhe H, Huyser J, Swinkels JA, et al. Dose escalation for insufficient response to standard-dose selective serotonin reuptake inhibitors in major depressive disorder: Systematic review. *British Journal of Psychiatry* 2006;189:309-16. doi: doi:: 10.1192/bjp.bp.105.018325
  40. Safer DJ. Raising the minimum effective dose of serotonin reuptake inhibitor antidepressants. *Journal of Clinical Psychopharmacology* 2016;36(5):483-91.
  41. Tan JY, Levin GM. Citalopram in the treatment of depression and other potential uses in psychiatry. *Pharmacotherapy* 1999;19(6):675-89.
  42. Vaswani M, Linda FK, Ramesh S. Role of selective serotonin reuptake inhibitors in psychiatric disorders: A comprehensive review. *Progress in Neuro-Psychopharmacology and Biological Psychiatry* 2003;27(1):85-102.

**Table S3 – Risk of bias**

| Review |            |                               | Phase 2                                    |                                        |                           | Phase 3                    |         |
|--------|------------|-------------------------------|--------------------------------------------|----------------------------------------|---------------------------|----------------------------|---------|
| Author | Year       | 1. Study eligibility criteria | 2. Identification and selection of studies | 3. Data collection and study appraisal | 4. Synthesis and findings | RISK OF BIAS IN THE REVIEW |         |
| 1      | Adli       | 2005                          | Low                                        | High                                   | High                      | Low                        | High    |
| 2      | Altamura   | 1988                          | High                                       | High                                   | High                      | High                       | High    |
| 3      | Baker      | 2003                          | Low                                        | High                                   | High                      | High                       | High    |
| 4      | Barburi    | 2002                          | Low                                        | Low                                    | High                      | Unclear                    | High    |
| 5      | Beasley    | 1990                          | Low                                        | High                                   | High                      | Low                        | High    |
| 6      | Beasley    | 1993                          | Unclear                                    | High                                   | High                      | High                       | High    |
| 7      | Benkert    | 1996                          | Unclear                                    | Unclear                                | High                      | Unclear                    | Unclear |
| 8      | Berney     | 2005                          | Unclear                                    | High                                   | High                      | Low                        | High    |
| 9      | Bollini    | 1999                          | Low                                        | Low                                    | Unclear                   | High                       | High    |
| 10     | Braun      | 2020                          | Low                                        | Low                                    | Low                       | Low                        | Low     |
| 11     | Cheng      | 2020                          | Low                                        | Unclear                                | Low                       | Low                        | Low     |
| 12     | Caley      | 2002                          | Unclear                                    | Unclear                                | High                      | Unclear                    | High    |
| 13     | Corruble   | 2000                          | Low                                        | Unclear                                | Unclear                   | Unclear                    | High    |
| 14     | Dold       | 2017                          | Low                                        | Low                                    | Low                       | Low                        | Low     |
| 15     | Dunner     | 1992                          | Unclear                                    | Unclear                                | High                      | Low                        | Unclear |
| 16     | Furukawa   | 2019                          | Unclear                                    | Low                                    | Low                       | Low                        | Low     |
| 17     | Furukawa   | 2020                          | Low                                        | Low                                    | Low                       | Low                        | Low     |
| 18     | Gutsmiedl  | 2020                          | Low                                        | Unclear                                | Low                       | Unclear                    | Unclear |
| 19     | Hamza      | 2021                          | Low                                        | Unclear                                | Unclear                   | Low                        | Unclear |
| 20     | Hansen     | 2009                          | Low                                        | Unclear                                | High                      | High                       | High    |
| 21     | Hieronimus | 2016                          | Low                                        | High                                   | Unclear                   | High                       | High    |
| 22     | Holper     | 2019                          | Low                                        | Low                                    | Low                       | High                       | High    |
| 23     | Jakubovski | 2016                          | High                                       | High                                   | High                      | High                       | High    |
| 24     | Jenner     | 1992                          | Unclear                                    | High                                   | High                      | Low                        | High    |
| 25     | Khan       | 2003                          | Low                                        | Unclear                                | High                      | Low                        | Unclear |
| 26     | Klemp      | 2011                          | Low                                        | Low                                    | Unclear                   | Unclear                    | Unclear |
| 27     | Lam        | 2006                          | Low                                        | High                                   | High                      | High                       | High    |
| 28     | Lane       | 1995                          | Unclear                                    | Unclear                                | High                      | High                       | High    |
| 29     | Mongomery  | 1995                          | High                                       | High                                   | High                      | High                       | High    |
| 30     | Montgomery | 1995                          | Unclear                                    | Unclear                                | Unclear                   | Low                        | Unclear |
| 31     | Montgomery | 1994                          | Unclear                                    | Unclear                                | High                      | High                       | High    |
| 32     | Murdoch    | 2005                          | Low                                        | Unclear                                | Unclear                   | Unclear                    | Unclear |
| 33     | Oliva      | 2021                          | Low                                        | Low                                    | High                      | High                       | High    |
| 34     | Papakostas | 2010                          | Low                                        | High                                   | High                      | Unclear                    | High    |
| 35     | Parker     | 2000                          | Low                                        | High                                   | Unclear                   | Low                        | High    |
| 36     | Preskorn   | 1995                          | Unclear                                    | Unclear                                | Unclear                   | Low                        | Unclear |
| 37     | Purgato    | 2015                          | Unclear                                    | Low                                    | Unclear                   | Low                        | Unclear |
| 38     | Rifkin     | 1997                          | Unclear                                    | Unclear                                | Unclear                   | Unclear                    | High    |
| 39     | Ruhe       | 2006                          | Unclear                                    | High                                   | Low                       | Low                        | High    |
| 40     | Safer      | 2016                          | Unclear                                    | Unclear                                | Unclear                   | Unclear                    | Unclear |
| 41     | Tan        | 1999                          | Unclear                                    | Unclear                                | Unclear                   | Low                        | Unclear |
| 42     | Vaswani    | 2003                          | Unclear                                    | Unclear                                | Unclear                   | Unclear                    | Unclear |

**Table S4 – Primary studies quality rating**

160 primary studies included in the reviews (N=5) assessed as being at low risk of bias. Of the 160 primary studies overall risk of bias was rated as low 34 (21%), moderate 120 (75%) and high 6 (4%).

| Study ID                                 | Dep. severity | Braun 2020 | Cheng 2020 | Dold 2017 | Furukawa 2019 | Furukawa 2020 | Overall risk of bias |
|------------------------------------------|---------------|------------|------------|-----------|---------------|---------------|----------------------|
| 1. Alexopoulos 2004 (Poster SCT-MD-27)   |               | n/a        | Mod.       | n/a       | n/a           | Mod.          | Mod.                 |
| 2. Amin 1984                             |               | n/a        | Mod.       | n/a       | n/a           | n/a           | Mod.                 |
| 3. Barber 2011                           |               | n/a        | n/a        | n/a       | n/a           | Mod.          | Mod.                 |
| 4. Benkert 1997                          |               | n/a        | n/a        | Mod.      | n/a           | n/a           | Mod.                 |
| 5. Binnemann2008 (NCT00143091)           |               | n/a        | Mod.       | n/a       | Mod.          | n/a           | Mod.                 |
| 6. Bjerkenstedt 1985                     |               | Mod.       | n/a        | n/a       | n/a           | n/a           | Mod.                 |
| 7. Bjerkenstedt2005                      |               | n/a        | Low        | n/a       | Low           | Low           | Low                  |
| 8. Bosc 1997a (Study 014 - Andreoli2002) |               | n/a        | Mod.       | n/a       | n/a           | Mod.          | Mod.                 |
| 9. Bose 2008 (SCT-MD-13)                 |               | n/a        | n/a        | n/a       | n/a           | Mod.          | Mod.                 |
| 10. Brunoni 2012                         |               | n/a        | Low        | n/a       | Low           | Low           | Low                  |
| 11. Buchsbaum 1997                       |               | n/a        | Mod.       | n/a       | n/a           | n/a           | Mod.                 |
| 12. Burke2002 (SCT-MD-01)                |               | Mod.       | Mod.       | n/a       | Mod.          | Mod.          | Mod.                 |
| 13. Byerley1988                          |               | n/a        | Low        | n/a       | n/a           | n/a           | Low                  |
| 14. CAGO178A2303 (NCT00463242)           |               | n/a        | Mod.       | n/a       | n/a           | Mod.          | Mod.                 |
| 15. Cassano 2002 (29060/421)             |               | n/a        | Mod.       | n/a       | n/a           | n/a           | Mod.                 |
| 16. CL3-20098-022                        |               | n/a        | n/a        | n/a       | Mod.          | Mod.          | Mod.                 |
| 17. CL3-20098-023                        |               | n/a        | n/a        | n/a       | Low           | Low           | Low                  |
| 18. CL3-20098-024                        |               | n/a        | n/a        | n/a       | Low           | Low           | Low                  |
| 19. Claghorn 1996                        |               | n/a        | Mod.       | n/a       | n/a           | n/a           | Mod.                 |
| 20. Clayton 2003 (Study 050)             |               | n/a        | Mod.       | n/a       | n/a           | Mod.          | Mod.                 |
| 21. Clayton 2006a (WELL AK130926)        |               | n/a        | n/a        | n/a       | n/a           | Mod.          | Mod.                 |
| 22. Clayton 2006b (WELL AK130927)        |               | n/a        | Mod.       | n/a       | n/a           | Mod.          | Mod.                 |
| 23. CN104-054 (FDA)                      |               | n/a        | n/a        | n/a       | Mod.          | Mod.          | Mod.                 |
| 24. Cohn 1985a                           |               | n/a        | Mod.       | n/a       | n/a           | Mod.          | Mod.                 |
| 25. Coleman 1999 (AK1A4002)              |               | n/a        | Mod.       | n/a       | n/a           | Mod.          | Mod.                 |
| 26. Coleman 2001 (AK1A4007)              |               | n/a        | Mod.       | n/a       | n/a           | Mod.          | Mod.                 |
| 27. Corrigan 2000                        |               | n/a        | Mod.       | n/a       | Mod.          | Mod.          | Mod.                 |
| 28. Croft 1999 (AK1A4001)                |               | n/a        | Low        | n/a       | n/a           | Mod.          | Mod.                 |
| 29. Davidson 2002 (HDTSG) (NCT00005013)  |               | n/a        | Low        | n/a       | n/a           | Low           | Low                  |
| 30. Detke 2004 (HMA Y Study Group A)     | Mild          | n/a        | Low        | n/a       | Low           | Low           | Low                  |
| 31. Doogan 1994                          |               | n/a        | Low        | n/a       | n/a           | Low           | Low                  |
| 32. Dornseif 1998                        |               | n/a        | n/a        | High      | n/a           | n/a           | High                 |
| 33. Dube 2010 (NCT00420004)              |               | n/a        | n/a        | n/a       | n/a           | Mod.          | Mod.                 |



|                                                                                          |      |      |      |     |      |      |      |
|------------------------------------------------------------------------------------------|------|------|------|-----|------|------|------|
| 34. Dunbar 1993a<br>(Claghorn1992,<br>Rickels1989,<br>Rickels1992, PAR 02-<br>001 - FDA) |      | n/a  | Mod. | n/a | n/a  | Mod. | Mod. |
| 35. Dunbar 1993b<br>(Claghorn1992, PAR 02-<br>002 - FDA)                                 |      | n/a  | Mod. | n/a | n/a  | Mod. | Mod. |
| 36. Dunbar 1993c<br>(Smith1992, PAR 02-003<br>- FDA)                                     |      | n/a  | Mod. | n/a | n/a  | Mod. | Mod. |
| 37. Dunbar 1993d<br>(Kiev1992, PAR 02-004 -<br>FDA)                                      |      | n/a  | Mod. | n/a | n/a  | Mod. | Mod. |
| 38. Dunner 1992 (PAR<br>29060.09)                                                        |      | Mod. | Mod. | n/a | Mod. | Mod. | Mod. |
| 39. Edwards1989<br>(MD/PAR/009 PAR-276)                                                  |      | n/a  | Mod. | n/a | Mod. | n/a  | Mod. |
| 40. Fabre 1987                                                                           | Mild | High | n/a  | n/a | n/a  | n/a  | High |
| 41. Fabre 1995 (SER 103<br>FDA)                                                          |      | Low  | Mod. | n/a | Mod. | Mod. | Mod. |
| 42. Fabre 1996                                                                           |      | n/a  | Low  | n/a | n/a  | n/a  | Low  |
| 43. Fava 1998                                                                            |      | n/a  | Mod. | n/a | n/a  | n/a  | Mod. |
| 44. Fava 2005                                                                            | Mild | n/a  | Mod. | n/a | Mod. | Mod. | Mod. |
| 45. Feighner 1989a                                                                       |      | n/a  | Mod. | n/a | n/a  | n/a  | Mod. |
| 46. Feighner 1989b                                                                       |      | n/a  | Low  | n/a | n/a  | n/a  | Low  |
| 47. Feighner 1993a<br>(Feighner 1989c PAR 03<br>001 - FDA)                               |      | n/a  | Mod. | n/a | n/a  | n/a  | Mod. |
| 48. Feighner 1993b<br>(Cohn1990 Cohn1992<br>PAR 03 002 - FDA)                            |      | n/a  | Mod. | n/a | n/a  | n/a  | Mod. |
| 49. Feighner 1993c (PAR 03<br>003 - FDA)                                                 |      | n/a  | Mod. | n/a | n/a  | n/a  | Mod. |
| 50. Feighner 1993d<br>(Shrivastava1992 PAR<br>03 004 - FDA)                              |      | n/a  | Mod. | n/a | n/a  | n/a  | Mod. |
| 51. Feighner 1993e<br>(Peselow1989 PAR 03<br>005 - FDA)                                  |      | n/a  | Mod. | n/a | n/a  | n/a  | Mod. |
| 52. Feighner 1993f<br>(Fabre1992 PAR 03 006<br>- FDA)                                    |      | n/a  | Mod. | n/a | n/a  | n/a  | Mod. |
| 53. Feighner 1999 (Study<br>91206 FDA)                                                   |      | Low  | Mod. | n/a | Mod. | Mod. | Mod. |
| 54. Fieve 1986                                                                           |      | High | n/a  | n/a | n/a  | n/a  | High |
| 55. Frank 2004                                                                           |      | n/a  | n/a  | n/a | Mod. | Mod. | Mod. |
| 56. Gastpar 2006                                                                         |      | n/a  | Low  | n/a | Low  | Low  | Low  |
| 57. Ghose 1997                                                                           |      | Low  | n/a  | n/a | n/a  | n/a  | Low  |
| 58. Golden 2002a<br>(29060/448)                                                          |      | n/a  | Mod. | n/a | n/a  | Mod. | Mod. |
| 59. Golden 2002b<br>(29060/449)                                                          |      | n/a  | Mod. | n/a | n/a  | Mod. | Mod. |
| 60. Goldstein 2002 (HMAQ -<br>Study Group A)                                             | Mild | n/a  | Mod. | n/a | n/a  | Mod. | Mod. |

|                                                     |      |      |      |     |      |      |      |
|-----------------------------------------------------|------|------|------|-----|------|------|------|
| 61. Goldstein 2004a (HMAT - Study Group A, ID#4091) | Mild | n/a  | Mod. | n/a | Mod. | Mod. | Mod. |
| 62. Goldstein 2004b (HMAT - Study Group B, ID#4091) | Mild | n/a  | Mod. | n/a | Mod. | Mod. | Mod. |
| 63. Gorman 2002 (SCT-MD-02)                         |      | n/a  | Mod. | n/a | n/a  | Mod. | Mod. |
| 64. Griebel 2012 (Study DF15878) (NCT00358631)      |      | n/a  | Mod. | n/a | Mod. | Mod. | Mod. |
| 65. Griebel 2012b (Study DF15879) (NCT00361491)     |      | n/a  | Mod. | n/a | Mod. | Mod. | Mod. |
| 66. Guy (1986) <sup>27</sup>                        |      | Mod. | n/a  | n/a | n/a  | n/a  | Mod. |
| 67. Hebenstreit 1989                                |      | Mod. | n/a  | n/a | n/a  | n/a  | Mod. |
| 68. Heiligenstein 1994                              | Mild | n/a  | Low  | n/a | Low  | Low  | Low  |
| 69. Higuchi 2009                                    |      | n/a  | Low  | n/a | n/a  | Low  | Low  |
| 70. Higuchi 2011 (PCR112810, NCT00866294)           |      | n/a  | Low  | n/a | n/a  | Low  | Low  |
| 71. Hirayasu 2011a                                  |      | Low  | Low  | n/a | Low  | Low  | Low  |
| 72. Hirayasu 2011b                                  |      | Low  | Low  | n/a | Low  | Low  | Low  |
| 73. Hunter 2010 (Study 1)                           |      | n/a  | n/a  | n/a | Mod. | Mod. | Mod. |
| 74. Jefferson 2000 (29060/785)                      |      | Mod. | Mod. | n/a | Mod. | Mod. | Mod. |
| 75. Kasper 2005a (Study 99024)                      |      | n/a  | n/a  | n/a | Mod. | Mod. | Mod. |
| 76. Kasper2012 (NCT00807248)                        |      | n/a  | Mod. | n/a | Mod. | n/a  | Mod. |
| 77. Kato 2018                                       |      | Mod. | n/a  | n/a | n/a  | n/a  | Mod. |
| 78. Katz 2004                                       |      | n/a  | n/a  | n/a | n/a  | Low  | Low  |
| 79. Keller 2006a (Study059) (NCT00035009)           |      | n/a  | n/a  | n/a | Mod. | Mod. | Mod. |
| 80. Keller 2006b (Study061) (NCT00035295)           |      | n/a  | n/a  | n/a | Mod. | Mod. | Mod. |
| 81. Keller 2006c (Study062) (NCT00048607)           |      | n/a  | Mod. | n/a | Mod. | Mod. | Mod. |
| 82. Kramer 1998                                     |      | n/a  | n/a  | n/a | Mod. | Mod. | Mod. |
| 83. Lam 1995                                        |      | n/a  | Mod. | n/a | Mod. | Mod. | Mod. |
| 84. Learned 2012 (NCT00420641)                      |      | n/a  | Mod. | n/a | Mod. | n/a  | Mod. |
| 85. Lepola 2003 (ESC 99003)                         |      | n/a  | Low  | n/a | n/a  | Low  | Low  |
| 86. Loo 2002 (CL2-014)                              |      | n/a  | Low  | n/a | Mod. | Mod. | Mod. |
| 87. Lopez Rodriguez 2004                            |      | n/a  | Mod. | n/a | Mod. | Mod. | Mod. |
| 88. Lydiard 1997                                    |      | n/a  | Mod. | n/a | n/a  | Mod. | Mod. |
| 89. M/2020/0046 (Study 046)                         |      | n/a  | Mod. | n/a | n/a  | Mod. | Mod. |
| 90. M/2020/0047 (Study 047)                         |      | n/a  | Mod. | n/a | n/a  | Mod. | Mod. |
| 91. Mao 2015 (NCT01098318)                          | Mild | n/a  | Mod. | n/a | n/a  | Mod. | Mod. |
| 92. Mathews 2015 (NCT01473381)                      |      | Low  | Low  | n/a | Low  | n/a  | Low  |
| 93. McGrath 2000                                    |      | n/a  | n/a  | n/a | n/a  | Mod. | Mod. |
| 94. Mendels 1999 (Study 85A - FDA)                  |      | n/a  | Mod. | n/a | n/a  | Mod. | Mod. |

|                                                                            |      |      |      |      |      |      |
|----------------------------------------------------------------------------|------|------|------|------|------|------|
| 95. Miller 1989<br>(MDUK/29060/III/82/006<br>(PAR-274) PAR UK 06 -<br>FDA) | n/a  | Mod. | n/a  | Mod. | n/a  | Mod. |
| 96. Mischoulon 2014<br>(NCT00101452)                                       | n/a  | Mod. | n/a  | n/a  | Mod. | Mod. |
| 97. Montgomery 1992 (Study<br>89303 FDA)                                   | Mod. | Mod. | n/a  | Mod. | Mod. | Mod. |
| 98. Moreno 2005                                                            | n/a  | Mod. | n/a  | Mod. | Mod. | Mod. |
| 99. Moscovitch 2004                                                        | n/a  | Low  | n/a  | n/a  | Low  | Low  |
| 100. Mundt 2012<br>(NCT00406952)                                           | n/a  | Mod. | n/a  | n/a  | Mod. | Mod. |
| 101. MY-1008/BRL-<br>029060/2/CPMS-076                                     | n/a  | n/a  | n/a  | Mod. | n/a  | Mod. |
| 102. MY-1042/BRL-<br>029060/CPMS-251                                       | n/a  | Mod. | n/a  | n/a  | Mod. | Mod. |
| 103. MY-1043/BRL-<br>029060/115                                            | n/a  | n/a  | n/a  | n/a  | Mod. | Mod. |
| 104. MY-1045/BRL-<br>029060/1 (PAR 128)                                    | n/a  | Mod. | n/a  | n/a  | Mod. | Mod. |
| 105. NCT00822744<br>(EudraCT Number2008-<br>001718-26)                     | n/a  | n/a  | n/a  | Mod. | Mod. | Mod. |
| 106. NCT01020799                                                           | n/a  | Low  | n/a  | Low  | n/a  | Low  |
| 107. NCT01808612                                                           | Low  | n/a  | n/a  | Low  | Low  | Low  |
| 108. Nemeroff 2007                                                         | n/a  | Mod. | n/a  | n/a  | Mod. | Mod. |
| 109. Nierenberg 2007<br>(F1J-MC-HMCR,<br>NCT00073411,<br>Pigott2007)       | n/a  | Low  | n/a  | Low  | Low  | Low  |
| 110. Ninan 2003 (poster<br>SCT-MD-26)                                      | n/a  | Mod. | n/a  | n/a  | Mod. | Mod. |
| 111. NKD20006<br>(NCT00048204)                                             | n/a  | Mod. | n/a  | Mod. | Mod. | Mod. |
| 112. Norton 1984                                                           | n/a  | Low  | n/a  | n/a  | n/a  | Low  |
| 113. Olie 1997                                                             | n/a  | Low  | n/a  | n/a  | Mod. | Mod. |
| 114. PAR 279 MDUK                                                          | n/a  | Mod. | n/a  | Mod. | n/a  | Mod. |
| 115. Perahia 2006 (HMAV<br>- Study Group B)                                | Mild | n/a  | Low  | n/a  | Low  | Low  |
| 116. PZ/109 (Hieronymus<br>2016)                                           | n/a  | Mod. | n/a  | n/a  | n/a  | Mod. |
| 117. PZ/111 (Hieronymus<br>2016)                                           | n/a  | Mod. | n/a  | n/a  | n/a  | Mod. |
| 118. Rapaport 2009<br>(BRL-29060/874)<br>(NCT00067444)                     | Low  | n/a  | n/a  | Mod. | Mod. | Mod. |
| 119. Ravindran 1995                                                        | n/a  | n/a  | n/a  | n/a  | Mod. | Mod. |
| 120. Reimherr 1990 (SER<br>104 - FDA)                                      | n/a  | Mod. | n/a  | n/a  | Mod. | Mod. |
| 121. Rosenberg 1994                                                        | Low  | n/a  | n/a  | n/a  | n/a  | Low  |
| 122. Roth 1990                                                             | n/a  | Mod. | n/a  | n/a  | n/a  | Mod. |
| 123. Rudolph 1999                                                          | n/a  | Low  | n/a  | n/a  | Low  | Low  |
| 124. Ruhe 2009                                                             | n/a  | n/a  | Low  | n/a  | n/a  | Low  |
| 125. Schatzberg 2006a                                                      | n/a  | n/a  | n/a  | n/a  | Mod. | Mod. |
| 126. Schneider 2003                                                        | n/a  | n/a  | n/a  | n/a  | Low  | Low  |
| 127. Schweizer 1990                                                        | n/a  | n/a  | High | n/a  | n/a  | High |

|      |                                                                     |      |      |      |      |      |      |      |
|------|---------------------------------------------------------------------|------|------|------|------|------|------|------|
| 128. | Schweizer 2001                                                      |      | n/a  | n/a  | Mod. | n/a  | n/a  | Mod. |
| 129. | SCT-MD-35<br>(NCT00109044)                                          |      | n/a  | n/a  | n/a  | Mod. | n/a  | Mod. |
| 130. | SCT-MD-49<br>(NCT00668525)                                          |      | Mod. | Low  | n/a  | Low  | Mod. | Mod. |
| 131. | SER 101 (FDA)                                                       |      | Mod. | n/a  | n/a  | High | High | High |
| 132. | SER 310 (FDA)                                                       |      | Mod. | n/a  | n/a  | Mod. | Mod. | Mod. |
| 133. | SER 315 (FDA)                                                       |      | n/a  | Mod. | n/a  | n/a  | Mod. | Mod. |
| 134. | Sheehan2009a                                                        |      | n/a  | Mod. | n/a  | n/a  | n/a  | Mod. |
| 135. | Silverstone 1999                                                    |      | n/a  | Mod. | n/a  | n/a  | Mod. | Mod. |
| 136. | Sramek 1995                                                         |      | n/a  | Low  | n/a  | Low  | Low  | Low  |
| 137. | Stahl 2000                                                          |      | n/a  | Mod. | n/a  | n/a  | Mod. | Mod. |
| 138. | Stark 1985 (Study 27<br>- FDA)                                      |      | n/a  | Mod. | n/a  | n/a  | Mod. | Mod. |
| 139. | Study 19 (Fabre<br>1985)                                            |      | n/a  | Mod. | n/a  | n/a  | n/a  | Mod. |
| 140. | Study 25 (Rickels<br>1986)                                          |      | n/a  | Mod. | n/a  | n/a  | n/a  | Mod. |
| 141. | Study 62a (FDA) -<br>(Dunlop1990)                                   | Mild | Mod. | Mod. | n/a  | Mod. | Mod. | Mod. |
| 142. | Study 62b (FDA)                                                     |      | n/a  | Mod. | n/a  | Mod. | Mod. | Mod. |
| 143. | Study 89306 (FDA)                                                   |      | Mod. | Mod. | n/a  | Mod. | Mod. | Mod. |
| 144. | Study F1J-MC-<br>HMAQ - Study Group B                               | Mild | n/a  | Mod. | n/a  | Mod. | Mod. | Mod. |
| 145. | Suri 2000                                                           |      | Mod. | n/a  | n/a  | n/a  | n/a  | Mod. |
| 146. | Trivedi 2004<br>(29060/810)                                         |      | Low  | Mod. | n/a  | Mod. | Mod. | Mod. |
| 147. | Tural 2003                                                          |      | High | n/a  | n/a  | n/a  | n/a  | High |
| 148. | VEN XR 367 (FDA)                                                    |      | n/a  | Mod. | n/a  | Mod. | Mod. | Mod. |
| 149. | Wade 2002 (ESC<br>Study 99001 - FDA)                                |      | n/a  | Low  | n/a  | Low  | Low  | Low  |
| 150. | Walczak 1996                                                        |      | Mod. | n/a  | n/a  | n/a  | n/a  | Mod. |
| 151. | Wang 2014<br>(EUCTR2005-005052-<br>40, NCT00351169,<br>D1448C00004) |      | n/a  | Mod. | n/a  | n/a  | Low  | Low  |
| 152. | WELL AK1A4006                                                       |      | n/a  | Mod. | n/a  | n/a  | Mod. | Mod. |
| 153. | Wernicke 1987                                                       |      | Mod. | n/a  | n/a  | n/a  | n/a  | Mod. |
| 154. | Wernicke 1988                                                       |      | Mod. | n/a  | n/a  | Mod. | Mod. | Mod. |
| 155. | Yevtushenko 2007                                                    |      | Low  | n/a  | n/a  | Low  | n/a  | Low  |
| 156. | 003-048                                                             |      | n/a  | Mod. | n/a  | Low  | n/a  | Mod. |
| 157. | 244 (EMD 68 843-<br>009) (FDA)                                      |      | n/a  | Mod. | n/a  | n/a  | Mod. | Mod. |
| 158. | 245 (EMD 68 843-<br>010) (FDA)                                      |      | Mod. | Mod. | n/a  | Mod. | Mod. | Mod. |
| 159. | 246 (SB 659746-<br>003) (FDA)                                       |      | Mod. | Mod. | n/a  | Mod. | Mod. | Mod. |
| 160. | 29060/07/01                                                         |      | n/a  | Mod. | n/a  | n/a  | n/a  | Mod. |

## Primary studies references

160 primary studies from the 5 reviews assessed as being at low risk of bias

1. Alexopoulos 2004 (poster SCT-MD-27)
  - 1. Alexopoulos GSG, J.; Zhang, D. A placebo-controlled trial of escitalopram and sertraline in the treatment of major depressive disorder. *Neuropsychopharmacology* 2004;29
  - [www.ncbi.nlm.nih.gov/pubmedhealth/PMH0016624/bin/app17c\\_et6.pdf](http://www.ncbi.nlm.nih.gov/pubmedhealth/PMH0016624/bin/app17c_et6.pdf)
2. Amin 1984
  - Amin MM, Ananth JV, Coleman BS, Darcourt G, Farkas T, Goldstein B, Lapierre YD, Paykel E, Wakelin JS. Fluvoxamine: antidepressant effects confirmed in a placebo-controlled international study. *Clinical Neuropharmacology* 1984;7(suppl 1):580-581.
3. Barber 2011
  - Barber JP, Barrett MS, Gallop R, Rynn MA, Rickels K. Short-term dynamic psychotherapy versus pharmacotherapy for major depressive disorder: a randomized, placebo-controlled trial. *J Clin Psychiatry*. 2012 Jan;73(1):66-73.
4. Benkert 1997
  - Benkert O, Szegedi A, Wetzel H, et al. Dose escalation vs. continued doses of paroxetine and maprotiline: A prospective study in depressed out-patients with inadequate treatment response. *Acta Psychiatrica Scandinavica* 1997;95(4):288-96.
5. Binnemann 2008 (NCT00143091)
  - Binneman B, Feltner D, Kolluri S, Shi Y, Qiu R, Stiger T. A 6-week randomized, placebo-controlled trial of CP-316,311 (a selective CRH1 antagonist) in the treatment of major depression. *Am J Psychiatry*. 2008;165(5):617-20.
6. Bjerkenstedt 1985
  - Bjerkenstedt L, Edman G, Flyckt L. Clinical and biochemical effects of citalopram, a selective 5-HT reuptake inhibitor - A dose-response study in depressed patients. *Psychopharmacology* 1985;87(3):253-59.
7. Bjerkenstedt 2005
  - Bjerkenstedt L1, Edman GV, Alken RG, Mannel M. Hypericum extract LI 160 and fluoxetine in mild to moderate depression: a randomized, placebo-controlled multi-center study in outpatients. *Eur Arch Psychiatry Clin Neurosci*. 2005 Feb;255(1):40-7.
8. Bosc 1997a (Study 014 – Andreoli 2002)
  - Andreoli V, Caillard V, Deo RS, Rybakowski JK, Versiani M. Reboxetine, a new noradrenaline selective antidepressant, is at least as effective as fluoxetine in the treatment of depression. *J Clin Psychopharm* 2002; 22: 393–99.
9. Bose 2008 (SCT-MD-13)
  - Bose A, Li D, Gandhi C. Escitalopram in the Acute Treatment of Depressed Patients Aged 60 Years or Older. *Am J Geriatric Psychiatry*. 2008 Jan;16(1):14-20.
10. Brunoni 2012
  - Brunoni AR, Valiengo L, Baccaro A, Zanão TA, de Oliveira JF, Goulart A, Boggio PS, Lotufo PA, Benseñor IM, Fregni F. The sertraline vs. electrical current therapy for treating depression clinical study: results from a factorial, randomized, controlled trial. *JAMA Psychiatry*. 2013;70(4):383-91.
11. Buchsbaum 1997
  - Buchsbaum MS, Wu J, Siegel BV, Hackett E, Trenary M, Abel L, Reynolds C. Effect of sertraline on regional metabolic rate in patients with affective disorder. *Biol Psychiatry*. 1997 Jan 1;41(1):15-22.
12. Burke 2002 (SCT-MD-01)
  - Burke WJ, Gergel I, Bose A. Fixed-dose trial of the single isomer SSRI escitalopram in depressed outpatients. *J Clin Psychiatry*. 2002 Apr;63(4):331-6
13. Byerley 1988
  - Byerley WF, Reimherr FW, Wood DR, Grosser BI. Fluoxetine, a selective serotonin

- uptake inhibitor, for the treatment of outpatients with major depression. *J Clin Psychopharmacol.* 1988;8(2):112-5.
14. CAGO178A2303 (NCT00463242)
    - <https://clinicaltrials.gov/ct2/show/record/NCT00463242?view=record>
  15. Cassano 2002 (29060/421)
    - Cassano GB, Puca F, Scapicchio PL, Trabucchi M; Italian Study Group on Depression in Elderly Patients. Paroxetine and fluoxetine effects on mood and cognitive functions in depressed nondemented elderly patients. *J Clin Psychiatry.* 2002 May;63(5):396-402.
    - <https://www.gsk-studyregister.com/en/trial-details/?id=29060/421>
  16. CL3-20098-022
    - [http://www.ema.europa.eu/docs/en\\_GB/document\\_library/EPAR\\_-\\_Public\\_assessment\\_report/human/000916/WC500038315.pdf](http://www.ema.europa.eu/docs/en_GB/document_library/EPAR_-_Public_assessment_report/human/000916/WC500038315.pdf)
  17. CL3-20098-023
    - [http://www.ema.europa.eu/docs/en\\_GB/document\\_library/EPAR\\_-\\_Public\\_assessment\\_report/human/000915/WC500046226.pdf](http://www.ema.europa.eu/docs/en_GB/document_library/EPAR_-_Public_assessment_report/human/000915/WC500046226.pdf)
  18. CL3-20098-024
    - [http://www.ema.europa.eu/docs/en\\_GB/document\\_library/EPAR\\_-\\_Public\\_assessment\\_report/human/000916/WC500038315.pdf](http://www.ema.europa.eu/docs/en_GB/document_library/EPAR_-_Public_assessment_report/human/000916/WC500038315.pdf)
  19. Claghorn 1996
    - Claghorn JL, Earl CQ, Walczak DD, Stoner KA, Wong LF, Kanter D, Houser VP. Fluvoxamine maleate in the treatment of depression: a single-center, double-blind, placebo-controlled comparison with imipramine in outpatients. *J Clin Psychopharmacol.* 1996 Apr;16(2):113-20.
  20. Clayton 2003 (Study 050)
    - Clayton AH, Zajecka J, Ferguson JM, Filipiak-Reisner JK, Brown MT, Schwartz GE. Lack of sexual dysfunction with the selective noradrenaline reuptake inhibitor reboxetine during treatment for major depressive disorder. *Int Clin Psychopharmacol.* 2003;18(3):151-6.
    - <https://www.iqwig.de/de/projekte-ergebnisse/studieninformationen-zu-reboxetin.3304.html>
  21. Clayton 2006a (WELL AK130926)
    - Clayton AH, Croft H, Horrigan JP, et al. Bupropion XL compared with escitalopram: effects on sexual functioning and antidepressant efficacy in two randomized, double-blind, placebo controlled studies. *J Clin Psychiatry* 2006; 67: 736–46.
    - <https://www.gsk-clinicalstudyregister.com/files2/20466.pdf>
  22. Clayton 2006b (WELL AK130927)
    - Clayton AH, Croft H, Horrigan JP, et al. Bupropion XL compared with escitalopram: effects on sexual functioning and antidepressant efficacy in two randomized, double-blind, placebo controlled studies. *J Clin Psychiatry* 2006; 67: 736–46.
    - <https://www.gsk-clinicalstudyregister.com/files2/20467.pdf>
  23. CN104-054 (FDA)
    - <http://digitalcommons.ohsu.edu/fdadrug/23/>
  24. Cohn 1985
    - Cohn JB, Wilcox C. A comparison of fluoxetine, imipramine, and placebo in patients with major depressive disorder. *J Clin Psychiatry.* 1985 Mar;46(3 Pt 2):26-31.
  25. Coleman 1999 (AK1A4002)
    - Coleman CC, Cunningham LA, Foster VJ, et al. Sexual dysfunction associated with the treatment of depression: a placebo-controlled comparison of bupropion sustained release and sertraline treatment. *Ann Clin Psychiatry* 1999; 11: 205–15.
    - <http://www.gsk-clinicalstudyregister.com/study/AK1A4002#rs>
  26. Coleman 2001 (AK1A4007)
    - Coleman CC, King BR, Bolden-Watson C, et al. A placebo-controlled comparison of the effects on sexual functioning of bupropion sustained release and fluoxetine. *Clin Ther* 2001; 23: 1040–58.
    - <http://www.gsk-clinicalstudyregister.com/study/AK1A4007#rs>
  27. Corrigan 2000

- Corrigan MH, Denahan AQ, Wright CE, Ragual RJ, Evans DL. Comparison of pramipexole, fluoxetine, and placebo in patients with major depression. *Depress Anxiety* 2000;11(2):58-65.
- 28. Croft 1999 (AK1A4001)
  - Croft H, Settle E Jr, Houser T, Batey SR, Donahue RMJ, Ascher JA. A placebo-controlled comparison of the antidepressant efficacy and effects on sexual functioning of sustained-release bupropion and sertraline. *Clin Ther* 1999; 21: 643–58.
  - <http://www.gsk-clinicalstudyregister.com/study/AK1A4001#rs>
- 29. Davidson 2002 (HDTSG, NCT00005013)
  - Hypericum Depression Trial Study Group. Effect of Hypericum perforatum (St John's wort) in major depressive disorder: a randomized controlled trial. *JAMA*. 2002 Apr 10;287(14):1807-14.
  - <https://www.clinicaltrials.gov/ct2/show/NCT00005013>
- 30. Detke 2004 (HMA Study Group A)
  - Detke MJ, Wiltse CG, Mallinckrodt CH, McNamara RK, Demitrack MA, Bitter I. Duloxetine in the acute and long-term treatment of major depressive disorder: a placebo- and paroxetine-controlled trial. *Eur Neuropsychopharmacol* 2004; 14: 457–70.
  - <http://www.lillytrials.com/results/Cymbalta.pdf>
- 31. Doogan 1994
  - Doogan D, Langdon C. Double-blind, placebo-controlled comparison of sertraline and dothiepin in treatment of major depression in general practice. *Int Clin Psychopharmacol* 1994;9:95-100.
- 32. Dornseif 1989
  - Dornseif BE, Dunlop SR, Potvin JH, et al. Effect of dose escalation after low-dose fluoxetine therapy. *Psychopharmacology Bulletin* 1989;25(1):71-79.
- 33. Dube 2010 (NCT00420004)
  - Dubé S, Dellva MA, Jones M, Kielbasa W, Padich R, Saha A, Rao P. A study of the effects of LY2216684, a selective norepinephrine reuptake inhibitor, in the treatment of major depression. *J Psychiatr Res*. 2010 Apr;44(6):356-63
  - <https://clinicaltrials.gov/ct2/show/NCT00420004>
- 34. Dunbar 1993a (Claghorn1992, Rickels1989, Rickels1992, PAR 02-001 - FDA)
  - Claghorn JL. The safety and efficacy of paroxetine compared with placebo in a double-blind trial of depressed outpatients. *J Clin Psychiatry*. 1992 Feb;53 Suppl:33-5.
  - <http://digitalcommons.ohsu.edu/fdadrug/26/>
- 35. Dunbar 1993b (Claghorn1992, PAR 02-002 - FDA)
  - Dunbar GC, Claghorn JL, Kiev A, Rickels K, Smith WT. A comparison of paroxetine and placebo in depressed outpatients. *Acta Psychiatr Scand*. 1993;87(5):302-5.
  - <http://digitalcommons.ohsu.edu/fdadrug/26/>
- 36. Dunbar 1993c (Smith1992, PAR 02-003 - FDA)
  - Smith WT, Glaudin V. A placebo-controlled trial of paroxetine in the treatment of major depression. *J Clin Psychiatry*. 1992;53 Suppl:36-9.
  - <http://digitalcommons.ohsu.edu/fdadrug/26/>
- 37. Dunbar 1993d (Kiev1992, PAR 02-004 - FDA)
  - Kiev A. A double-blind, placebo-controlled study of paroxetine in depressed outpatients. *J Clin Psychiatry*. 1992;53 Suppl:27-9.
  - <http://digitalcommons.ohsu.edu/fdadrug/26/>
- 38. Dunner 1992 (PAR 29060.09)
  - Dunner DL, Dunbar GC. Optimal dose regimen for paroxetine. *J Clin Psychiatry*. 1992;53 Suppl:21- 6.
  - <http://www.gsk-clinicalstudyregister.com/study/29060/009#rs>
- 39. Edwards 1989 (MD/PAR/009 PAR-276)
  - Edwards JG, Goldie A. Placebo-controlled trial of paroxetine in depressive illness. *Human Psychopharmacology* 1993;8:203-209



- <https://www.gsk-studyregister.com/en/trial-details/?id=29060/276>
- 40. Fabre 1987
  - Fabre LF, Putman IHP. A fixed-dose clinical trial of fluoxetine in outpatients with major depression. *Journal of Clinical Psychiatry* 1987;48(10):406-08.
- 41. Faber 1995 (SER 103 FDA)
  - Fabre L, Abuzzahab F, Amin M, Claghorn J, Mendels J, Dubé S, Small JG. Sertraline in major depression: double-blind comparison with placebo. *Biol Psychiatry* 1995;38:592-602.
  - <http://digitalcommons.ohsu.edu/fdadrug/27/>
- 42. Fabre 1996
  - Fabre L, Birkhimer L, Zaborny B, Wong L, Kapik B. Fluvoxamine vs imipramine and placebo: a double-blind comparison in depressed patients. *Int Clin Psychopharmacol* 1996;11:119-27.
- 43. Fava 1998
  - Fava M, Amsterdam JD, Deltito JA. A double-blind study of paroxetine, fluoxetine, and placebo in outpatients with major depression. *Ann Clin Psychiatry* 1998; 10: 145–50.
- 44. Fava 2005
  - Fava M, Alpert J, Nierenberg AA, Mischoulon D, Otto MW, Zajecka J, Murck H, Rosenbaum JF. A Double-blind, randomized trial of St John's wort, fluoxetine, and placebo in major depressive disorder. *J Clin Psychopharmacol*. 2005 Oct;25(5):441-7.
- 45. Feighner 1989a
  - Feighner JP, Boyer WF, Merideth CH, Hendrickson GG. A double-blind comparison of fluoxetine, imipramine and placebo in outpatients with major depression. *Int Clin Psychopharmacol*. 1989 Apr;4(2):127-34.
- 46. Feighner 1989b
  - Feighner JP, Boyer WF, Meredith CH, Hendrickson GG. A placebo-controlled inpatient comparison of fluvoxamine maleate and imipramine in major depression. *Int Clin Psychopharmacol*. 1989 Jul;4(3):239-44.
- 47. Feighner 1993a (Feighner 1989c, PAR 03 001 - FDA)
  - Feighner JP, Boyer WF. Paroxetine in the treatment of depression: a comparison with imipramine and placebo. *Acta Psychiatr Scand Suppl*. 1989;350:125-9.
  - <http://digitalcommons.ohsu.edu/fdadrug/26/>
- 48. Feighner 1993b (Cohn1990, Cohn1992, PAR 03 002 - FDA)
  - Cohn JB, Wilcox CS. Paroxetine in major depression: a double-blind trial with imipramine and placebo. *J Clin Psychiatry*. 1992 Feb;53 Suppl:52-6.
  - <http://digitalcommons.ohsu.edu/fdadrug/26/>
- 49. Feighner 1993c (PAR 03 003 - FDA)
  - Dunbar GC, Cohn JB, Fabre LF, Feighner JP, Fieve RR, Mendels J, Shrivastava RK. A comparison of paroxetine, imipramine and placebo in depressed out-patients. *Br J Psychiatry*. 1991 Sep;159:394-8.
  - <http://digitalcommons.ohsu.edu/fdadrug/26/>
- 50. Feighner 1993d (Shrivastava 1992, PAR 03 004 - FDA)
  - Shrivastava RK, Shrivastava SH, Overweg N, Blumhardt CL. A double-blind comparison of paroxetine, imipramine and placebo in major depression. *J Clin Psychiatry* 1992;53 Suppl:48-51.
  - <http://digitalcommons.ohsu.edu/fdadrug/26/>
- 51. Feighner 1993e (PAR 03 005 - FDA)
  - Feighner JP, Cohn JB, Fabre LF Jr, Fieve RR, Mendels J, Shrivastava RK, Dunbar GC. A study comparing paroxetine placebo and imipramine in depressed patients. *Journal of Affective Disorders*. 28(2):71-79, 1993.
  - <http://digitalcommons.ohsu.edu/fdadrug/26/>
- 52. Feighner 1993f (Fabre 1992, PAR 03 006 - FDA)
  - Fabre LF. A 6-week, double-blind trial of paroxetine, imipramine, and placebo in depressed outpatients. *J Clin Psychiatry*. 1992;53 Suppl:40-3.



- <http://digitalcommons.ohsu.edu/fdadrug/26/>
- 53. Feighner 1999 (Study 91206 FDA)
  - Feighner JP1, Overø K. Multicenter, placebo-controlled, fixed-dose study of citalopram in moderate- to-severe depression. *J Clin Psychiatry*. 1999 Dec;60(12):824-30.
- 54. Fieve 1986
  - Fieve RR, Goodnick PJ, Peselow E, et al. Fluoxetine response: endpoint vs pattern analysis. *International clinical psychopharmacology* 1986;1(4):320-23.
- 55. Frank 2004
  - Frank MG, Hendricks SE, Burke WJ, Johnson DR. Clinical response augments NK cell activity independent of treatment modality: a randomized double-blind placebo controlled antidepressant trial. *Psychol Med*. 2004 Apr;34(3):491-8.
- 56. Gastpar 2006
  - Gastpar M, Singer A, Zeller K. Comparative efficacy and safety of a once-daily dosage of hypericum extract STW3-VI and citalopram in patients with moderate depression: a double-blind, randomised, multicentre, placebo-controlled study. *Pharmacopsychiatry*. 2006 Mar;39(2):66-75.
- 57. Ghose 1997
  - Ghose K. Tolerance and side-effects of paroxetine in elderly depressed patients. *Archives of Gerontology & Geriatrics* 1997;24(1):35-45.
- 58. Golden 2002a (29060/448)
  - Golden RN, Nemeroff CB, McSorley P, Pitts CD, Dubé EM. Efficacy and tolerability of controlled- release and immediate-release paroxetine in the treatment of depression. *J Clin Psychiatry*. 2002 Jul;63(7):577-84.
  - <http://www.gsk-clinicalstudyregister.com/study/29060/448#rs>
- 59. Golden 2002b (29060/449)
  - Golden RN, Nemeroff CB, McSorley P, Pitts CD, Dubé EM. Efficacy and tolerability of controlled- release and immediate-release paroxetine in the treatment of depression. *J Clin Psychiatry*. 2002 Jul;63(7):577-84.
  - <http://www.gsk-clinicalstudyregister.com/study/29060/449#rs>
- 60. Goldstein 2002 (HMAQ - Study Group A)
  - Goldstein DJ, Mallinckrodt C, Lu Y, Demitrack MA. Duloxetine in the treatment of major depressive disorder: a double-blind clinical trial. *J Clin Psychiatry*. 2002; 63: 225–31.
  - <http://www.lillytrials.com/results/Cymbalta.pdf>
  - [https://www.accessdata.fda.gov/drugsatfda\\_docs/nda/2004/021427\\_s000\\_Cymbalta\\_Statr.pdf](https://www.accessdata.fda.gov/drugsatfda_docs/nda/2004/021427_s000_Cymbalta_Statr.pdf)
- 61. Goldstein 2004a (HMAT - Study Group A, ID#4091)
  - <http://www.lillytrials.com/results/Cymbalta.pdf>
  - [https://www.accessdata.fda.gov/drugsatfda\\_docs/nda/2004/021427\\_s000\\_Cymbalta\\_Statr.pdf](https://www.accessdata.fda.gov/drugsatfda_docs/nda/2004/021427_s000_Cymbalta_Statr.pdf)
- 62. Goldstein 2004b (HMAT - Study Group B, ID#4091)
  - Goldstein DJ, Lu Y, Detke MJ, Wiltse C, Mallinckrodt C, Demitrack MA. Duloxetine in the treatment of depression: a double-blind placebo-controlled comparison with paroxetine. *J Clin Psychopharmacol*. 2004; 24: 389–99.
  - [https://www.accessdata.fda.gov/drugsatfda\\_docs/nda/2004/021427\\_s000\\_Cymbalta\\_Statr.pdf](https://www.accessdata.fda.gov/drugsatfda_docs/nda/2004/021427_s000_Cymbalta_Statr.pdf)
- 63. Gorman 2002 (SCT-MD-02)
  - Gorman JM, Korotzer A, Su G. Efficacy comparison of escitalopram and citalopram in the treatment of major depressive disorder: pooled analysis of placebo-controlled trials. *CNS Spectr*. 2002 Apr;7(4 Suppl 1):40-4.
  - [www.ncbi.nlm.nih.gov/pubmedhealth/PMH0016624/bin/app17c\\_et6.pdf](http://www.ncbi.nlm.nih.gov/pubmedhealth/PMH0016624/bin/app17c_et6.pdf)
- 64. Griebel 2012a (Study DF15878, NCT00358631)
  - Griebel G, Beeské S, Stahl SM. The vasopressin V(1b) receptor antagonist SSR149415 in the treatment of major depressive and generalized anxiety disorders: results from 4 randomized, double- blind, placebo-controlled studies. *J Clin Psychiatry*. 2012

- Nov;73(11):1403-11.
- <https://clinicaltrials.gov/ct2/show/NCT00358631>
65. Griebel 2012b (Study DF15879, NCT00361491)
- Griebel G, Beeské S, Stahl SM. The vasopressin V(1b) receptor antagonist SSR149415 in the treatment of major depressive and generalized anxiety disorders: results from 4 randomized, double-blind, placebo-controlled studies. *J Clin Psychiatry*. 2012 Nov;73(11):1403-11.
  - <https://clinicaltrials.gov/ct2/show/NCT00361491>
66. Guy 1986
- Guy W, Manov G, Wilson WH. Double-blind dose determination study of a new antidepressant-sertraline. *Drug Development Research* 1986;9(4):267-72.
67. Hebenstreit 1989
- Hebenstreit GF, Fellerer K, Zochling R, et al. A pharmacokinetic dose titration study in adult and elderly depressed patients. *Acta Psychiatrica Scandinavica, Supplement* 1989;80(350):81-84.
68. Heiligenstein 1994
- Heiligenstein J, Faries D, Rush A, Andersen J, Pande A, Roffwarg H, Dunner D, Gillin J, James S, Lahmeyer H. Latency to rapid eye movement sleep as a predictor of treatment response to fluoxetine and placebo in nonpsychotic depressed outpatients. *Psychiatry Res*. 1994;52:327-39.
69. Higuchi 2009
- Higuchi T, Murasaki M, Kamijima K. Clinical evaluation of duloxetine in the treatment of major depressive disorder. *Jpn J Clin Psychopharmacol* 2009;12:1613-1634.
70. Higuchi 2011 (PCR112810, NCT00866294)
- Higuchi T, Hong JP, Jung HY, Watanabe Y, Kunitomi T, Kamijima K. Paroxetine controlled-release formulation in the treatment of major depressive disorder: a randomized, double-blind, placebo-controlled study in Japan and Korea. *Psychiatry Clin Neurosci* 2011;65:655-63.
  - <http://www.gsk-clinicalstudyregister.com/study/112810#ps>
  - <https://clinicaltrials.gov/ct2/show/NCT00866294>
71. Hirayasu 2011a
- Hirayasu Y. A dose-response study of escitalopram in patients with major depressive disorder: a placebo-controlled, double-blind study. *Jpn J Clin Psychopharmacol* 2011;14:871-882.
72. Hirayasu 2011b
- Hirayasu Y. A dose-response and non-inferiority study evaluating the efficacy and safety of escitalopram in patients with major depressive disorder. *Jpn J Clin Psychopharmacol* 2011;14:883- 899.
73. Hunter 2010 (Study 1)
- Hunter AM, Muthén BO, Cook IA, Leuchter AF. Antidepressant response trajectories and quantitative electroencephalography (QEEG) biomarkers in major depressive disorder. *J Psychiatr Res*. 2010 Jan;44(2):90-8.
74. Jefferson 2000 (29060/785)
- Jefferson J, Griest J. A double-blind, placebo controlled, fixed-dosage study comparing the efficacy and tolerability of paroxetine CR and citalopram to placebo in the treatment of Major Depressive Disorder with anxiety. American College of Neuropsychopharmacology, 39th Annual Meeting 12/11/2000 San Juan, Puerto Rico.
  - <http://www.gsk-clinicalstudyregister.com/study/29060/785#csr>
75. Kasper 2005 (Study 99024)
- Kasper S, de Swart H, Friis Andersen H. Escitalopram in the treatment of depressed elderly patients. *Am J Geriatr Psychiatry*. 2005 Oct;13(10):884-91.
76. Kasper 2012 (NCT00807248)
- Kasper S, Ebert B, Larsen K, Tonnoir B. Combining escitalopram with gaboxadol provides no additional benefit in the treatment of patients with severe major depressive disorder.

- Int J Neuropsychopharmacol. 2012 Jul;15(6):715-25.
- <https://clinicaltrials.gov/ct2/show/NCT00807248>
77. Kato 2018
- Kato T, Furukawa TA, Mantani A, et al. Optimising first- and second-line treatment strategies for untreated major depressive disorder - the SUND study: a pragmatic, multi-centre, assessor-blinded randomised controlled trial. *BMC Medicine* 2018;16(1):103.
78. Katz 2004
- Katz MM, Tekell JL, Bowden CL, Brannan S, Houston JP, Berman N, Frazer A. Onset and early behavioral effects of pharmacologically different antidepressants and placebo in depression. *Neuropsychopharmacology*.2004;29(3):566-79.
79. Keller 2006a (Study059, NCT00035009)
- Keller M, Montgomery S, Ball W, Morrison M, Snavely D, Liu G, Hargreaves R, Hietala J, Lines C, Beebe K, Reines S. Lack of efficacy of the substance p (neurokinin1 receptor) antagonist aprepitant in the treatment of major depressive disorder. *Biol Psychiatry*. 2006 Feb 1;59(3):216-23.
  - <https://clinicaltrials.gov/ct2/show/NCT00035009>
80. Keller 2006b (Study061, NCT00035295)
- Keller M, Montgomery S, Ball W, Morrison M, Snavely D, Liu G, Hargreaves R, Hietala J, Lines C, Beebe K, Reines S. Lack of efficacy of the substance p (neurokinin1 receptor) antagonist aprepitant in the treatment of major depressive disorder. *Biol Psychiatry*. 2006 Feb 1;59(3):216-23.
  - <https://clinicaltrials.gov/ct2/show/NCT00035295?term=NCT00035295&rank=1>
81. Keller 2006c (Study062, NCT00048607)
- Keller M, Montgomery S, Ball W, Morrison M, Snavely D, Liu G, Hargreaves R, Hietala J, Lines C, Beebe K, Reines S. Lack of efficacy of the substance p (neurokinin1 receptor) antagonist aprepitant in the treatment of major depressive disorder. *Biol Psychiatry*. 2006 Feb 1;59(3):216-23.
  - <https://clinicaltrials.gov/ct2/show/NCT00048607?term=NCT00048607&rank=1>
82. Kramer 1998
- Kramer MS, Cutler N, Feighner J, Shrivastava R, Carman J, Sramek JJ, Reines SA, Liu G, Snavely D, Wyatt-Knowles E, Hale JJ, Mills SG, MacCoss M, Swain CJ, Harrison T, Hill RG, Hefti F, Scolnick EM, Cascieri MA, Chicchi GG, Sadowski S, Williams AR, Hewson L, Smith D, Carlson EJ, Hargreaves RJ, Rupniak NM. Distinct mechanism for antidepressant activity by blockade of central substance P receptors. *Science*. 1998 Sep 11;281(5383):1640-5.
83. Lam 1995
- Lam RW, Gorman CP, Michalon M, Steiner M, Levitt AJ, Corral MR, Watson GD, Morehouse RL, Tam W, Joffe RT. Multicenter, placebo-controlled study of fluoxetine in seasonal affective disorder. *Am J Psychiatry*. 1995;152(12):1765-70.
84. Learned 2012 (NCT00420641)
- Learned S, Graff O, Roychowdhury S, Moate R, Krishnan KR, Archer G, Modell JG, Alexander R, Zamuner S, Lavergne A, Evoniuk G, Ratti E. Efficacy, safety, and tolerability of a triple reuptake inhibitor GSK372475 in the treatment of patients with major depressive disorder: two randomized, placebo- and active-controlled clinical trials. *J Psychopharmacol*. 2012 May;26(5):653-62.
  - <https://clinicaltrials.gov/ct2/show/NCT00420641>
85. Lepola 2003 (ESC 99003)
- Lepola UM, Loft H, Reines EH. Escitalopram (10-20 mg/day) is effective and well tolerated in a placebo-controlled study in depression in primary care. *Int Clin Psychopharmacol*. 2003 Jul;18(4):211-7.
86. Loo 2002 (CL2-014)
- Loo H, Hale A, D'haenen H. Determination of the dose of agomelatine, a melatonergic agonist and selective 5-HT(2C) antagonist, in the treatment of major depressive disorder: a placebo-controlled dose range study. *Int Clin Psychopharmacol*. 2002 Sep;17(5):239-

- 47.
87. Lopez-Rodriguez 2004
- Rodriguez JL, Lopez Butron MA, Vargas Terrez BE, Villamil Salcedo V. Estudio doble ciego con antidepresivo, psicoterapia breve y placebo en pacientes con depression leve a moderada. *Salud Mental* 2004;27:53-61.
88. Lydiard 1997
- Lydiard RB1, Stahl SM, Hertzman M, Harrison WM. A double-blind, placebo-controlled study comparing the effects of sertraline versus amitriptyline in the treatment of major depression. *J Clin Psychiatry*. 1997 Nov;58(11):484-91.
89. M/2020/0046 (Study 046)
- <https://www.iqwig.de/de/projekte-ergebnisse/studieninformationen-zu-reboxetin.3304.html>
90. M/2020/0047 (Study 047)
- <https://www.iqwig.de/de/projekte-ergebnisse/studieninformationen-zu-reboxetin.3304.html>
91. Mao 2015 (NCT01098318)
- Mao JJ, Xie SX, Zee J, Soeller I, Li QS, Rockwell K, Amsterdam JD. Rhodiola rosea versus sertraline for major depressive disorder: A randomized placebo-controlled trial. *Phytomedicine*. 2015 Mar 15;22(3):394-9.
  - <https://clinicaltrials.gov/ct2/show/NCT01098318>
92. Mathews 2015 (NCT01473381)
- Mathews M, Gommoll C, Chen D, Nunez R, Khan A. Efficacy and safety of vilazodone 20 and 40 mg in major depressive disorder: a randomized, double-blind, placebo-controlled trial. *Int Clin Psychopharmacol*. 2015;30(2):67-74.
  - <https://clinicaltrials.gov/ct2/show/NCT01473381>
93. McGrath 2000
- McGrath PJ, Stewart JW, Janal MN, Petkova E, Quitkin FM, Klein DF. A placebo-controlled study of fluoxetine versus imipramine in the acute treatment of atypical depression. *Am J Psychiatry*. 2000 Mar;157(3):344-50.
94. Mendels 1999 (Study 85A - FDA)
- Mendels J, Kiev A, Fabre LF. Double blind comparison of citalopram and placebo in depressed outpatients with melancholia. *Depress Anxiety*. 1999;9(2):54-60.
  - [http://www.accessdata.fda.gov/drugsatfda\\_docs/nda/98/020822a.cfm](http://www.accessdata.fda.gov/drugsatfda_docs/nda/98/020822a.cfm)
95. Miller 1989 (MDUK/29060/III/82/006, PAR-274, PAR UK 06 - FDA)
- Miller SM, Naylor GJ, Murtagh M, Winslow G. A double-blind comparison of paroxetine and placebo in the treatment of depressed patients in a psychiatric outpatient clinic. *Acta Psychiatr Scand Suppl*. 1989;350:143-4.
  - <http://digitalcommons.ohsu.edu/fdadrug/26/>
96. Mischoulon 2014 (NCT00101452)
- Mischoulon D, Price LH, Carpenter LL, Tyrka AR, Papakostas GI, Baer L, Dording CM, Clain AJ, Durham K, Walker R, Ludington E, Fava M. A double-blind, randomized, placebo-controlled clinical trial of S-adenosyl-L-methionine (SAME) versus escitalopram in major depressive disorder. *J Clin Psychiatry*. 2014 Apr;75(4):370-6. doi: 10.4088/JCP.13m08591.
  - <https://clinicaltrials.gov/ct2/show/NCT00101452>
97. Montgomery 1992 (Study 89303 FDA)
- Montgomery SA, Rasmussen JG, Lyby K, et al. Dose response relationship of citalopram 20 mg, citalopram 40 mg and placebo in the treatment of moderate and severe depression. *International clinical psychopharmacology* 1992;6 Suppl 5:65-70.
  - [http://www.accessdata.fda.gov/drugsatfda\\_docs/nda/98/020822a.cfm](http://www.accessdata.fda.gov/drugsatfda_docs/nda/98/020822a.cfm)
98. Moreno 2005
- Moreno RA, Teng CT, Almeida KM, Tavares Junior H. Hypericum perforatum versus fluoxetine in the treatment of mild to moderate depression: a randomized double-blind trial in a Brazilian sample. *Rev Bras Psiquiatr*. 2006 Mar;28(1):29-32.

99. Moscovitch 2004
- Moscovitch A, Blashko CA, Eagles JM, Darcourt G, Thompson C, Kasper S, Lane RM; International Collaborative Group on Sertraline in the Treatment of Outpatients with Seasonal Affective Disorders. A placebo-controlled study of sertraline in the treatment of outpatients with seasonal affective disorder. *Psychopharmacology (Berl)*. 2004 Feb;171(4):390-7.
100. Mundt 2012 (NCT00406952)
- Mundt JC, Vogel AP, Feltner DE, Lenderking WR. Vocal acoustic biomarkers of depression severity and treatment response. *Biol Psychiatry*. 2012 Oct 1;72(7):580-7.
  - <https://clinicaltrials.gov/ct2/show/NCT00406952>
101. MY-1008/BRL-029060/2/CPMS-076
- <https://www.gsk-clinicalstudyregister.com/study/29060/076#rs>
102. MY-1042/BRL-029060/CPMS-251
- <http://www.gsk-clinicalstudyregister.com/study/29060/251?search=compound&compound=paroxetine#rs>
103. MY-1043/BRL-029060/115
- <http://www.gsk-clinicalstudyregister.com/study/29060/115#rs>
104. MY-1045/BRL-029060/1 (PAR 128)
- <http://www.gsk-clinicalstudyregister.com/study/29060/128#rs>
105. NCT00822744 (EudraCT Number2008-001718-26)
- <https://clinicaltrials.gov/ct2/show/NCT00822744>
  - <https://www.clinicaltrialsregister.eu/ctr-search/trial/2008-001718-26/SK>
106. NCT01020799
- <https://clinicaltrials.gov/ct2/show/NCT01020799>
107. NCT01808612
- <https://clinicaltrials.gov/ct2/show/NCT01808612>
108. Nemeroff 2007
- Nemeroff CB, Thase ME; EPIC 014 Study Group. A double-blind, placebo-controlled comparison of venlafaxine and fluoxetine treatment in depressed outpatients. *J Psychiatry Res* 2007;41: 351–59.
109. Nierenberg 2007 (F1J-MC-HMCR, NCT00073411, Pigott 2007)
- Nierenberg AA, Greist JH, Mallinckrodt CH, et al. Duloxetine versus escitalopram and placebo in the treatment of patients with major depressive disorder: onset of antidepressant action, a non-inferiority study. *Curr Med Res Opin* 2007; 23: 401–16.
  - <http://www.lillytrials.com/results/Cymbalta.pdf>
  - <https://clinicaltrials.gov/ct2/show/NCT00073411>
110. Ninan 2003 (poster SCT-MD-26)
- [www.ncbi.nlm.nih.gov/pubmedhealth/PMH0016624/bin/app17c\\_et6.pdf](http://www.ncbi.nlm.nih.gov/pubmedhealth/PMH0016624/bin/app17c_et6.pdf)
111. NKD20006 (NCT00048204)
- <http://www.gsk-clinicalstudyregister.com/study/NKD20006#ps>
  - <https://clinicaltrials.gov/ct2/show/NCT00048204>
112. Norton 1984
- Norton KR, Sireling LI, Bhat AV, Rao B, Paykel ES. A double-blind comparison of fluvoxamine, imipramine and placebo in depressed patients. *J Affect Disord*. 1984;7:297-308.
113. Olie 1997
- Olie J, Gunn K, Katz E. A double-blind placebo-controlled multicentre study of sertraline in the acute and continuation treatment of major depression. *Eur Psychiatry*. 1997;12(1):34-41.
114. PAR 279 MDUK
- [http://www.gsk-clinicalstudyregister.com/study/29060/012\\_3?search=compound&compound=paroxetine#rs](http://www.gsk-clinicalstudyregister.com/study/29060/012_3?search=compound&compound=paroxetine#rs)



115. Perahia 2006 (HMAY - Study Group B)
  - Perahia DG, Wang F, Mallinckrodt CH, Walker DJ, Detke MJ. Duloxetine in the treatment of major depressive disorder: a placebo- and paroxetine-controlled trial. *Eur Psychiatry* 2006; 21: 367–78.
  - <http://www.lillytrials.com/results/Cymbalta.pdf>
116. PZ/109 (Hieronymous 2016)
  - Hieronymus F, Emilsson JF, Nilsson S, Eriksson E. Consistent superiority of selective serotonin reuptake inhibitors over placebo in reducing depressed mood in patients with major depression. *Mol Psychiatry*. 2016 Apr;21(4):523-30.
117. PZ/111 (Hieronymous 2016)
  - Hieronymus F, Emilsson JF, Nilsson S, Eriksson E. Consistent superiority of selective serotonin reuptake inhibitors over placebo in reducing depressed mood in patients with major depression. *Mol Psychiatry*. 2016 Apr;21(4):523-30.
118. Rapaport 2009 (BRL-29060/874, NCT00067444)
  - Rapaport MH, Lydiard RB, Pitts CD, Schaefer D, Bartolic EI, Iyengar M, Carfagno M, Lipschitz A. Low doses of controlled-release paroxetine in the treatment of late-life depression: a randomized, placebo-controlled trial. *J Clin Psychiatry*. 2009 Jan;70(1):46-57.
  - <https://www.clinicaltrials.gov/ct2/show/NCT00067444>
119. Ravindran 1995
  - Ravindran AV, Teehan MD, Bakish D, Yatham L, O'Reilly R, Fernando ML, Manchanda R, Charbonneau Y, Butters J. The impact of sertraline, desipramine, and placebo on psychomotor functioning in depression. *Human Psychopharmacology*. 1995; 10(4):273–281.
120. Reimherr 1990 (SER 104 - FDA)
  - Reimherr FW, Chouinard G, Cohn CK, Cole JO, Itil TM, LaPierre YD, Masco HL, Mendels J. Antidepressant efficacy of sertraline: a double-blind, placebo- and amitriptyline-controlled, multicenter comparison study in outpatients with major depression. *J Clin Psychiatry*. 1990 Dec;51 Suppl B:18-27.
  - <http://digitalcommons.ohsu.edu/fdadrug/27/>
121. Rosenberg 1994
  - Rosenberg C, Damsbo N, Fuglum E, et al. Citalopram and imipramine in the treatment of depressive patients in general practice. A Nordic multicentre clinical study. *International Clinical Psychopharmacology* 1994;9 Suppl 1:41-8.
122. Roth 1990
  - Roth D, Mattes J, Sheehan KH, Sheehan DV. A double-blind comparison of fluvoxamine, desipramine and placebo in outpatients with depression. *Progress in Neuro-Psychopharmacology and Biological Psychiatry*. 1990;14(6):929–939.
123. Rudolph 1999
  - Rudolph RL, Feiger AD. A double-blind, randomized, placebo-controlled trial of once-daily venlafaxine extended release (xr) and fluoxetine for the treatment of depression. *J Affect Disord* 1999; 56: 171–81.
124. Ruhe 2009
  - Ruhé HG, Booij J, Weert HCv, et al. Evidence Why Paroxetine Dose Escalation is Not Effective in Major Depressive Disorder: A Randomized Controlled Trial With Assessment of Serotonin Transporter Occupancy. *Neuropsychopharmacology* 2009;34(4):999-1010. doi: 10.1038/npp.2008.148
125. Schatzberg 2006
  - Schatzberg A, Roose S. A double-blind, placebo-controlled study of venlafaxine and fluoxetine in geriatric outpatients with major depression. *Am J Geriatr Psychiatry*. 2006 Apr;14(4):361-70.
126. Schneider 2003
  - Schneider LS, Nelson JC, Clary CM, Newhouse P, Krishnan KR, Shiovitz T, Weihs K; Sertraline Elderly Depression Study Group. An 8-week multicenter, parallel-group,

- double-blind, placebo- controlled study of sertraline in elderly outpatients with major depression. *Am J Psychiatry*. 2003 Jul;160(7):1277-85.
127. Schweizer 1990
- Schweizer E, Rickels K, Amsterdam JD, et al. What constitutes an adequate antidepressant trial for fluoxetine? *Journal of Clinical Psychiatry* 1990;51(1):8-11.
128. Schweizer 2001
- Schweizer E, Rynn M, Mandos LA, et al. The antidepressant effect of sertraline is not enhanced by dose titration: Results from an outpatient clinical trial. *International Clinical Psychopharmacology* 2001;16(3):137-43.
129. SCT-MD-35 (NCT00109044)
- <https://clinicaltrials.gov/ct2/show/NCT00109044>
130. SCT-MD-49 (NCT00668525)
- <https://clinicaltrials.gov/ct2/show/NCT00668525>
131. SER 101 (FDA)
- <http://digitalcommons.ohsu.edu/fdadrug/27/>
132. SER 310 (FDA)
- <http://digitalcommons.ohsu.edu/fdadrug/27/>
133. SER 315 (FDA)
- <http://digitalcommons.ohsu.edu/fdadrug/27/>
134. Sheehan 2009
- Sheehan DV, Nemeroff CB, Thase ME, Entsuah R; EPIC 016 Study Group. Placebo-controlled inpatient comparison of venlafaxine and fluoxetine for the treatment of major depression with melancholic features. *Int Clin Psychopharmacol*. 2009 Mar;24(2):61-86.
135. Silverstone 1999
- Silverstone PH, Ravindran A. Once-daily venlafaxine extended release (xr) compared with fluoxetine in outpatients with depression and anxiety. *Venlafaxine xr 360 study group*. *J Clin Psychiatry* 1999; 60: 22–28.
136. Sramek 1995
- Sramek JJ, Kashkin K, Jasinsky O, Kardatzke D, Kennedy S, Cutler NR. Placebo-controlled study of ABT-200 versus fluoxetine in the treatment of major depressive disorder. *Depression* 1995;3:199-203.
137. Stahl 2000
- Stahl SM. Placebo-controlled comparison of the selective serotonin reuptake inhibitors citalopram and sertraline. *Biol Psychiatry*. 2000 Nov 1;48(9):894-901.
138. Stark 1985 (Study 27 - FDA)
- Stark P, Hardison CD. A review of multicenter controlled studies of fluoxetine vs. imipramine and placebo in outpatients with major depressive disorder. *J Clin Psychiatry* 1985;46:53-8.
  - <http://digitalcommons.ohsu.edu/fdadrug/22/>
139. Study 19 (FDA) (Fabre 1985)
- Fabre, LF, Crismon, L. Efficacy of fluoxetine in outpatients with major depression. *Current Therapeutic Research*. 1985;37(1):115-23.
  - <http://digitalcommons.ohsu.edu/fdadrug/22/>
140. Study 25 (FDA) (Rickels 1986)
- Rickels K, Amsterdam JD, Avallone MF. Fluoxetine in major depression: A controlled study. *Current Therapeutic Research*. 1986;39(4):559-63.
  - <http://digitalcommons.ohsu.edu/fdadrug/22/>
141. Study 62a (FDA) (Dunlop 1990)
- Dunlop SR, Dornseif BE, Wernicke JR, Potvin JH. Pattern analysis shows beneficial effect of fluoxetine treatment in mild depression. *Psychopharmacology bulletin*. 1990;26(2):173-80.
  - <http://digitalcommons.ohsu.edu/fdadrug/22/>
142. Study 62b (FDA) - MODERATE depression
- <http://digitalcommons.ohsu.edu/fdadrug/22/>

143. Study 89306 (FDA)
  - [http://www.accessdata.fda.gov/drugsatfda\\_docs/nda/98/020822a\\_mdr\\_P2.pdf](http://www.accessdata.fda.gov/drugsatfda_docs/nda/98/020822a_mdr_P2.pdf)
144. Study F1J-MC-HMAQ - Study Group B
  - <http://www.lillytrials.com/results/Cymbalta.pdf>
  - [https://www.accessdata.fda.gov/drugsatfda\\_docs/nda/2004/021427\\_s000\\_Cymbalta\\_Statr.pdf](https://www.accessdata.fda.gov/drugsatfda_docs/nda/2004/021427_s000_Cymbalta_Statr.pdf)
145. Suri 2000
  - Suri RA, Altshuler LL, Rasgon NL, et al. Efficacy and response time to sertraline versus fluoxetine in the treatment of unipolar major depressive disorder. *Journal of Clinical Psychiatry* 2000;61(12):942-6.
146. Trivedi 2004 (29060/810)
  - Trivedi MH, Pigotti TA, Perera P, Dillingham KE, Carfagno ML, Pitts CD. Effectiveness of low doses of paroxetine controlled release in the treatment of major depressive disorder. *J Clin Psychiatry*. 2004;65(10):1356-64.
  - <http://www.gsk-clinicalstudyregister.com/study/29060/810?search=study&#rs>
147. Tural 2003
  - Tural U, Onder E. Fluoxetine once every third day in the treatment of major depressive disorder. *European Archives of Psychiatry and Clinical Neuroscience* 2003;253(6):307-12.
148. VEN XR 367 (FDA)
  - <http://digitalcommons.ohsu.edu/fdadrug/25/>
149. Wade 2002 (ESC Study 99001 - FDA)
  - Wade A, Michael Lemming O, Bang Hedegaard K. Escitalopram 10 mg/day is effective and well tolerated in a placebo-controlled study in depression in primary care. *Int Clin Psychopharmacol*. 2002;17(3):95-102.
  - [http://www.lundbeck.com/upload/trials/files/pdf/completed/99001\\_CTRS\\_final\\_30Dec2005.pdf](http://www.lundbeck.com/upload/trials/files/pdf/completed/99001_CTRS_final_30Dec2005.pdf)
150. Walczak 1996
  - Walczak DD, Apter JT, Halikas JA, Borison RL, Carman JS, Post GL, Patrick R, Cohn JB, Cunningham LA, Rittberg B, Preskorn SH, Kang JS, Wilcox CS. The oral dose-effect relationship for fluvoxamine: a fixed-dose comparison against placebo in depressed outpatients. *Ann Clin Psychiatry*. 1996 Sep;8(3):139-51.
151. Wang 2014 (EUCTR2005-005052-40, NCT00351169, D1448C00004)
  - Wang G, McIntyre A, Earley WR, Raines SR, Eriksson H. A randomized, double-blind study of the efficacy and tolerability of extended-release quetiapine fumarate (quetiapine XR) monotherapy in patients with major depressive disorder. *Neuropsychiatr Dis Treat*. 2014 Jan 30;10:201-16.
152. WELL AK140016
  - <https://www.gsk-clinicalstudyregister.com/study/AK140016#rs>
153. Wernicke 1987
  - Wernicke JF, Dunlop SR, Dornseif BE, et al. Fixed-dose fluoxetine therapy for depression. *Psychopharmacology Bulletin* 1987;23(1):164-68.
154. Wernicke 1988
  - Wernicke JF, Dunlop SR, Dornseif BE, et al. Low-dose fluoxetine therapy for depression. *Psychopharmacology Bulletin* 1988;24(1):183-88.
155. Yevtushenko 2007
  - Yevtushenko VY, Belous AI, Yevtushenko YG, Gusinin SE, Buzik OJ, Agibalova TV. Efficacy and tolerability of escitalopram versus citalopram in major depressive disorder: a 6-week, multicenter, prospective, randomized, double-blind, active-controlled study in adult outpatients. *Clin Ther*. 2007 Nov;29(11):2319-32.
156. 003-048
  - <http://digitalcommons.ohsu.edu/fdadrug/20/>
157. 244 (EMD 68 843-009)
  - [http://www.accessdata.fda.gov/drugsatfda\\_docs/nda/2011/022567Orig1s000MedR.pdf](http://www.accessdata.fda.gov/drugsatfda_docs/nda/2011/022567Orig1s000MedR.pdf)



158. 245 (EMD 68 843-010)
  - [http://www.accessdata.fda.gov/drugsatfda\\_docs/nda/2011/022567Orig1s000MedR.pdf](http://www.accessdata.fda.gov/drugsatfda_docs/nda/2011/022567Orig1s000MedR.pdf)
159. 246 (SB 659746-003)
  - [http://www.accessdata.fda.gov/drugsatfda\\_docs/nda/2011/022567Orig1s000MedR.pdf](http://www.accessdata.fda.gov/drugsatfda_docs/nda/2011/022567Orig1s000MedR.pdf)
160. 29060 07 001
  - <http://www.gsk-clinicalstudyregister.com/study/29060/07/001#rs>
1. Adli M, Baethge C, Heinz A, et al. Is dose escalation of antidepressants a rational strategy after a medium-dose treatment has failed? A systematic review. *European Archives of Psychiatry & Clinical Neuroscience* 2005;255(6):387-400.
2. Altamura AC, Montgomery SA, Wernicke JF. The evidence for 20mg a day of fluoxetine as the optimal dose in the treatment of depression. *British Journal of Psychiatry* 1988;153(Suppl 3):109-12.
3. Baker CB, Tweedie R, Duval S, et al. Evidence that the SSRI dose response in treating major depression should be reassessed: A meta-analysis. *Depression and Anxiety* 2003;17(1):1-9. doi: 10.1002/da.10079
4. Barbui C, Hotopf M, Garattini S. Fluoxetine dose and outcome in antidepressant drug trials. *European Journal of Clinical Pharmacology* 2002;58(6):379-86.
5. Beasley Jr CM, Bosomworth JC, Wernicke JF. Fluoxetine: Relationships among dose, response, adverse events, and plasma concentrations in the treatment of depression. *Psychopharmacology Bulletin* 1990;26(1):18-24.
6. Beasley CMJ, Potvin JH. Fluoxetine: Activating and sedating effects. *International Clinical Psychopharmacology* 1993;8(4):271-75.
7. Benkert O, Szegedi A, Wetzel H. Minimum effective dose for antidepressants - An obligatory requirement for antidepressant drug evaluation? *International Clinical Psychopharmacology* 1996;11(3):177-85.
8. Berney P. Dose-response relationship of recent antidepressants in the short-term treatment of depression. *Dialogues in Clinical Neuroscience* 2005;7(3):249-62.
9. Bollini P, Pampallona S, Tibaldi G, et al. Effectiveness of antidepressants. Meta-analysis of dose-effect relationships in randomised clinical trials. *British Journal of Psychiatry* 1999;174:297-303.
10. Braun C, Adams A, Rink L, et al. In search of a dose-response relationship in SSRIs-a systematic review, meta-analysis, and network meta-analysis. *Acta Psychiatrica Scandinavica* 2020;142(6):430-42.
11. Caley CF, Kando JC. SSRI efficacy-finding the right dose. *Journal of Psychiatric Practice* 2002;8(1):33-40.
12. Cheng Q, Huang J, Xu L, et al. Analysis of time-course, dose-effect, and influencing factors of antidepressants in the treatment of acute adult patients with major depression. *International Journal of Neuropsychopharmacology* 2020;23(2):76-87.
13. Corruble E, Guelfi JD. Does increasing dose improve efficacy in patients with poor antidepressant response: a review. *Acta Psychiatrica Scandinavica* 2000;101(5):343-48.
14. Dold M, Bartova L, Rupprecht R, et al. Dose Escalation of Antidepressants in Unipolar Depression: A Meta-Analysis of Double-Blind, Randomized Controlled Trials. *Psychotherapy and Psychosomatics* 2017;86(5):283-91.
15. Dunner DL, Dunbar GC. Optimal dose regimen for paroxetine. *Journal of Clinical Psychiatry* 1992;53(Suppl):21-26.
16. Furukawa TA, Cipriani A, Cowen PJ, et al. Optimal dose of selective serotonin reuptake inhibitors, venlafaxine, and mirtazapine in major depression: a systematic review and

- dose-response meta-analysis. *Lancet Psychiatry* 2019;6(7):601-09. doi: [https://doi.org/10.1016/S2215-0366\(19\)30217-2](https://doi.org/10.1016/S2215-0366(19)30217-2)
17. Furukawa TA, Salanti G, Cowen PJ, et al. No benefit from flexible titration above minimum licensed dose in prescribing antidepressants for major depression: systematic review. *Acta Psychiatrica Scandinavica* 2020;141(5):401-09.
  18. Gutsmedl K, Krause M, Bighelli I, et al. How well do elderly patients with major depressive disorder respond to antidepressants: A systematic review and single-group meta-analysis. *BMC Psychiatry* 2020;20(1)
  19. Hansen RA, Moore CG, Dusetzina SB, et al. Controlling for drug dose in systematic review and meta-analysis: A case study of the effect of antidepressant dose. *Medical Decision Making* 2009;29(1):91-103.
  20. Hamza T, Cipriani A, Furukawa TA, et al. A Bayesian dose-response meta-analysis model: A simulations study and application. *Statistical Methods in Medical Research* 2021;30(5):1358-72.
  21. Hieronymus F, Nilsson S, Eriksson E. A mega-analysis of fixed-dose trials reveals dose-dependency and a rapid onset of action for the antidepressant effect of three selective serotonin reuptake inhibitors. *Translational Psychiatry* 2016;6:e834. doi: doi:10.1038/tp.2016.104
  22. Holper L. Optimal doses of antidepressants in dependence on age: Combined covariate actions in Bayesian network meta-analysis. *EClinicalMedicine* 2020;18:100219.
  23. Jakubovski E, Varigonda AL, Freemantle N, et al. Systematic Review and Meta-Analysis: Dose-Response Relationship of Selective Serotonin Reuptake Inhibitors in Major Depressive Disorder. *American Journal of Psychiatry* 2016;173(2):174-83. doi: 10.1176/appi.ajp.2015.15030331
  24. Jenner PN. Paroxetine: an overview of dosage, tolerability, and safety. *International Clinical Psychopharmacology* 1992;6(Suppl 4):69-80.
  25. Khan A, Khan SR, Walens G, et al. Frequency of positive studies among fixed and flexible dose antidepressant clinical trials: an analysis of the food and drug administration summary basis of approval reports. *Neuropsychopharmacology* 2003;28(3):552-57.
  26. Klemp M, Tvette IF, Gasemyr J, et al. Meta-regression analysis of paroxetine clinical trial data: does reporting scale matter? *Journal of Clinical Psychopharmacology* 2011;31(2):201-06.
  27. Lam RW, Andersen HF. The influence of baseline severity on efficacy of escitalopram and citalopram in the treatment of major depressive disorder: An extended analysis. *Pharmacopsychiatry* 2006;39(5):180-84.
  28. Lane R, Baldwin D, Preskorn S. The SSRIs: advantages, disadvantages and differences. *Journal of Psychopharmacology* 1995;9(Suppl 2):163-78.
  29. Montgomery SA, Pedersen V, Tanghøj P, et al. The optimal dosing regimen for citalopram: A meta-analysis of nine placebo-controlled studies. *International Clinical Psychopharmacology* 1994;9(Suppl 1):35-40.
  30. Montgomery S. Serotonin, sertraline and depression. *Journal of Psychopharmacology* 1995;9(Suppl 2):179-84.
  31. Montgomery SA. Selecting the optimum therapeutic dose of serotonin reuptake inhibitors: Studies with citalopram. *International Clinical Psychopharmacology* 1995;10(Suppl 1):23-27.
  32. Murdoch D, Kean SJ. Escitalopram: A review of its use in the management of major depressive disorder. *Drugs* 2005;65(16):2379-404.
  33. Oliva V, Lippi M, Paci R, et al. Gastrointestinal side effects associated with antidepressant treatments in patients with major depressive disorder: A systematic

- review and meta-analysis. *Progress in Neuro-Psychopharmacology and Biological Psychiatry* 2021;109:110266.
34. Papakostas GI, Charles D, Fava M. Are typical starting doses of the selective serotonin reuptake inhibitors sub-optimal? A meta-analysis of randomized, double-blind, placebo-controlled, dose-finding studies in major depressive disorder. *World Journal of Biological Psychiatry* 2010;11(2 (Part 2)):300-07.
  35. Parker NG, Brown CS. Citalopram in the treatment of depression. *Annals of Pharmacotherapy* 2000;34(6):761-71.
  36. Purgato M, Gastaldon C, Papola D, et al. Drug dose as mediator of treatment effect in antidepressant drug trials: The case of fluoxetine. *Acta Psychiatrica Scandinavica* 2015;131(6):408-16.
  37. Preskorn SH, Lane RM. Sertraline 50 mg daily: the optimal dose in the treatment of depression. *International Clinical Psychopharmacology* 1995;10(3):129-41.
  38. Rifkin A. SSRI optimal dose remains at issue. *Journal of Clinical Psychiatry* 1997;58(2):87-88.
  39. Ruhe H, Huyser J, Swinkels JA, et al. Dose escalation for insufficient response to standard-dose selective serotonin reuptake inhibitors in major depressive disorder: Systematic review. *British Journal of Psychiatry* 2006;189:309-16. doi: doi:: 10.1192/bjp.bp.105.018325
  40. Safer DJ. Raising the minimum effective dose of serotonin reuptake inhibitor antidepressants. *Journal of Clinical Psychopharmacology* 2016;36(5):483-91.
  41. Tan JY, Levin GM. Citalopram in the treatment of depression and other potential uses in psychiatry. *Pharmacotherapy* 1999;19(6):675-89.
  42. Vaswani M, Linda FK, Ramesh S. Role of selective serotonin reuptake inhibitors in psychiatric disorders: A comprehensive review. *Progress in Neuro-Psychopharmacology and Biological Psychiatry* 2003;27(1):85-102.
